# 1 **An integrated platform to systematically identify causal variants** 2 **and genes for polygenic human traits.**

3 Damien J. Downes<sup>1</sup>, Ron Schwessinger<sup>1,2,\*</sup>, Stephanie J. Hill<sup>1,\*</sup>, Lea Nussbaum<sup>1,\*</sup>, Caroline  
4 Scott<sup>1</sup>, Matthew E. Gosden<sup>1</sup>, Priscila P. Hirschfeld<sup>1</sup>, Jelena M. Telenius<sup>1,2</sup>, Chris Q.  
5 Eijsbouts<sup>1,3,4</sup>, Simon J. McGowan<sup>2</sup>, Antony J. Cutler<sup>4,5</sup>, Jon Kerry<sup>1</sup>, Jessica L. Davies<sup>6</sup>,  
6 Calliope A. Dendrou<sup>4,6</sup>, Jamie R.J. Inshaw<sup>5</sup>, Martin S.C. Larke<sup>1</sup>, A. Marieke Oudelaar<sup>1,2</sup>,  
7 Yavor Bozhilov<sup>1</sup>, Andrew J. King<sup>1</sup>, Richard C. Brown<sup>2</sup>, Maria C. Suci<sup>1</sup>, James O.J. Davies<sup>1</sup>,  
8 Philip Hublitz<sup>7</sup>, Chris Fisher<sup>1</sup>, Ryo Kurita<sup>8</sup>, Yukio Nakamura<sup>9</sup>, Gerton Lunter<sup>2</sup>, Stephen  
9 Taylor<sup>2</sup>, Veronica J. Buckle<sup>1</sup>, John A. Todd<sup>5</sup>, Douglas R. Higgs<sup>1</sup>, & Jim R. Hughes<sup>1,2,†</sup>.

10

11 \* These authors contributed equally: Ron Schwessinger, Stephanie J. Hill, Lea Nussbaum.

12

13 † Corresponding author: [jim.hughes@imm.ox.ac.uk](mailto:jim.hughes@imm.ox.ac.uk)

14

## 15 **Affiliations:**

16 1 MRC Molecular Haematology Unit, MRC Weatherall Institute of Molecular Medicine,  
17 Radcliffe Department of Medicine, University of Oxford, Oxford, UK

18 2 MRC WIMM Centre for Computational Biology, MRC Weatherall Institute of  
19 Molecular Medicine, Radcliffe Department of Medicine, University of Oxford, Oxford,  
20 UK

21 3 Big Data Institute, Li Ka Shing Centre for Health Information and Discovery,  
22 University of Oxford, Oxford, UK

23 4 Wellcome Centre for Human Genetics, Nuffield Department of Medicine, University  
24 of Oxford, Oxford, UK

25 5 JDRF/Wellcome Diabetes and Inflammation Laboratory, Wellcome Centre for Human  
26 Genetics, Nuffield Department of Medicine, University of Oxford, Oxford, UK

27 6 MRC Human Immunology Unit, MRC Weatherall Institute of Molecular Medicine,  
28 Radcliffe Department of Medicine, University of Oxford, Oxford, UK

29 7 WIMM Genome Engineering Facility, MRC Weatherall Institute of Molecular  
30 Medicine, Radcliffe Department of Medicine, University of Oxford, Oxford, UK

31 8 Dept. of Research and Development, Central Blood Institute, Japanese Red Cross  
32 Society, Minato-ku, Tokyo, Japan

33 9 Cell Engineering Division, RIKEN BioResource Research Center, Tsukuba, Ibaraki,  
34 Japan

35

36 **KEY WORDS:** GWAS, gene regulation, chromatin conformation, machine learning.

37 **ABSTRACT**

38 **Genome-wide association studies (GWAS) have identified over 150,000 links between**  
39 **common genetic variants and human traits or complex diseases. Over 80% of these**  
40 **associations map to polymorphisms in non-coding DNA. Therefore, the challenge is**  
41 **to identify disease-causing variants, the genes they affect, and the cells in which**  
42 **these effects occur. We have developed a platform using ATAC-seq, DNaseI**  
43 **footprints, NG Capture-C and machine learning to address this challenge. Applying**  
44 **this approach to red blood cell traits identifies a significant proportion of known**  
45 **causative variants and their effector genes, which we show can be validated by direct**  
46 ***in vivo* modelling.**

## 47 INTRODUCTION

48 Identification of the variation of the genome that determines the risk of common chronic and  
49 infectious diseases informs on their primary causes, which leads to preventative or  
50 therapeutic approaches and insights. Whilst genome-wide association studies (GWASs)  
51 have identified thousands of chromosome regions<sup>1</sup>, the identification of the causal genes,  
52 variants and cell types remains a major bottleneck. This is due to three major features of the  
53 genome and its complex association with disease susceptibility. Trait-associated variants  
54 are often tightly associated, through linkage disequilibrium (LD), with tens or hundreds of  
55 other variants, mostly single-nucleotide polymorphisms (SNPs), any one or more of which  
56 could be causal; the majority (>85%) the variants identified in GWAS lie within the non-  
57 coding genome<sup>2</sup>. Although non-coding regions are increasingly well annotated, many  
58 variants do not correspond to known regulatory elements, and even when they do, it is rarely  
59 known which genes these elements control, and in which cell types. New technical  
60 approaches to link variants to the genes they control are rapidly improving but are often  
61 limited by their sensitivity and resolution<sup>3-6</sup>; and because so few causal variants have been  
62 unequivocally linked to the genes they affect, the mechanisms by which non-coding variants  
63 alter gene expression remain unknown in all but a few cases; and, third, the complexity of  
64 gene regulation and cell/cell interactions means that knowing when in development, in which  
65 cell type, in which activation state, and within which pathway(s) a causal variant exerts its  
66 effect is usually impossible to predict. Although significant progress is being made, currently,  
67 none of these problems has been adequately solved.

68

69 Here, we have developed an integrated platform of experimental and computational  
70 methods to prioritise likely causal variants, link them to the genes they regulate, and  
71 determine the mechanism by which they alter gene function. To illustrate the approach we  
72 have initially focussed on a single haematopoietic lineage: the development of mature red  
73 blood cells (RBC), for which all stages of lineage specification and differentiation from a  
74 haematopoietic stem cell to a RBC are known, and can be recapitulated *ex vivo* by culture of  
75 CD34<sup>+</sup> progenitor and stem cells<sup>7-9</sup>. GWASs have identified over 550 chromosome regions  
76 associated with changes in the phenotypes of mature RBC<sup>10,11</sup>; within these regions 1,114  
77 index SNPs are in high LD with 30,694 variants, of which, only eight have been claimed as  
78 causal regulatory variants through experimental validation<sup>12-16</sup>.

79

80 We first identify the key cell type(s) throughout erythropoiesis by analysing enrichment of  
81 GWAS variants lying within regions of open chromatin. These regions contain the tissue-  
82 specific regulatory elements of the genome (promoters, enhancers and boundary elements).  
83 We next focus on the ~8% of variants which lie within regulatory elements in the non-coding

84 genome; with the remaining variants assessed for effects on coding sequences and RNA  
85 processing using established programmes<sup>17-19</sup>. The platform addresses the fact that both  
86 causal and non-causal variants may lie in open chromatin. Using DNaseI footprinting and a  
87 machine learning approach the platform prioritises variants predicted to directly affect the  
88 binding of transcription factors or alter chromatin accessibility<sup>20,21</sup>. Having prioritised putative  
89 regulatory causal variants, the platform then links the regulatory elements in which they  
90 occur to genes using NG Capture-C, the highest resolution chromatin conformation capture  
91 (3C) method currently available for targeting numerous loci<sup>22,23</sup>. To validate the predicted  
92 molecular changes caused by such GWAS variants we use CRISPR/Cas9 facilitated  
93 Homology Dependent Recombination (HDR) to directly model SNP alleles and determine  
94 their effects.

95

96 Testing our platform against 75 chromosome regions from a previous GWAS of RBC traits<sup>11</sup>  
97 we identified putative causal variants at ~80%, their candidate effector genes at ~70%, and  
98 three or fewer candidate variants at ~60%. By benchmarking with the eight validated causal  
99 variants from previous studies<sup>12-16</sup>, and genes at well characterised erythroid loci, we  
100 successfully predicted >87% of both causal variants and effector genes. Finally, we used  
101 genome editing to directly determine the *in vivo* molecular effects of candidate SNPs in two  
102 regions – showing both SNPs to be causal and verifying *JAK2* as a novel RBC trait effector  
103 gene. As this platform was developed with methods appropriate for small numbers of cells,  
104 and therefore rare cell types, the approach will enable researchers across a wide range of  
105 traits or disorders to more readily identify causal variants, the cells in which they exert their  
106 effects, their target genes, and the mechanisms by which they alter cell biology, and  
107 ultimately, disease risk.

## 108 RESULTS

### 109 Enrichment of variants influencing RBC traits in highly active erythroid enhancers.

110 The first stage of an integrated platform for dissecting polygenic traits is the identification of  
111 key cell types (Supplementary Fig. 1). Recently, ATAC-seq allowed a comprehensive  
112 identification of *cis*-regulatory elements which remain constitutively present or dynamically  
113 change throughout haematopoietic lineage specification, differentiation, and maturation<sup>8,24</sup>.  
114 To identify regulatory regions in early, intermediate and late erythroid cells we generated  
115 ATAC-seq from such cells obtained by *ex vivo* erythroid differentiation of CD34<sup>+</sup> stem and  
116 progenitor cells<sup>9</sup> from three healthy, non-anaemic individuals (Supplementary Fig. 2). We  
117 also examined ATAC-seq profiles from a variety of haematopoietic cells, including erythroid  
118 progenitors (Fig. 1a,b); in total identifying 238,918 open-chromatin regions (496-4,136 bp)  
119 present at one or more stages of erythropoiesis.

120  
121 Previously, 1,114 index SNPs, each of which identifies a region of LD, have been associated  
122 with specific RBC traits in two extensive GWAS of Asian and European populations<sup>10,11</sup>.  
123 These index SNPs are associated, via LD ( $r^2 \geq 0.8$ ), with a total of 30,694 variants.  
124 Approximately 8% of these variants, covering ~60% of RBC trait regions, intersected with  
125 open chromatin in erythropoietic cells ( $n=2,590$ ). Intersections were predominantly found in  
126 fully committed, intermediate erythroid cells (days 10-13, cumulative binomial distribution,  
127  $p=7 \times 10^{-29}$ ) rather than in multipotent progenitor cells (Fig. 1a, Supplementary Figs. 3a,b).  
128 Enrichment was trait specific as variants associated with immune diseases<sup>25-27</sup> showed  
129 minimal enrichment for intersection with erythroid open chromatin but strong enrichment in  
130 differentiated lymphocytes (Supplementary Fig. 3d-f) while non-haematological trait  
131 variants<sup>28-30</sup> showed no enrichment in either red or white blood cells. For all traits, we saw  
132 no enrichment when we analysed ATAC-seq profiles from two non-haematopoietic cell lines.

133  
134 To further characterise the intersected regulatory elements, we generated ChIP-seq data to  
135 distinguish promoters (Histone-3 Lysine-4 trimethylation, H3K4me3), enhancers (H3K4  
136 monomethylation, H3K4me1), boundary elements (CTCF), and “active” sites (H3 Lysine-27  
137 acetylation, H3K27ac) in committed erythroid cells. We applied GenoSTAN<sup>31</sup> to assign a  
138 chromatin signature to each element and thereby generated a high-resolution map of open  
139 chromatin in erythroid cells with seven functional classes (Fig. 1c, Supplementary Fig. 4).  
140 Intersected elements were enriched for enhancers and promoters with high levels of  
141 H3K27ac but not those with low levels of H3K27ac, nor ATAC-seq peaks with CTCF  
142 enrichment (Fig. 1c). When putative enhancers were ranked for their levels of H3K27ac (Fig.  
143 1d), elements containing RBC variants were significantly enriched amongst the highly  
144 activity erythroid enhancers ( $\chi^2$ : d.f.=3,  $p=7 \times 10^{-54}$ ).

145

146 Cell-specific intersection is consistent with previous studies<sup>32-34</sup>, and as shown here, when  
147 applied to highly-stratified cell types may help identify the precise cells in which the variant  
148 affects function. For example, four variants including the predicted causative SNP  
149 rs1175550<sup>13</sup> intersect a *cis*-regulatory element in the Small Integral Membrane Protein 1  
150 (SMIM1; Vel Blood Group) encoding locus. This element is associated with a region of open  
151 chromatin which only appears in megakaryocytic-erythroid progenitors (MEPs) and  
152 early/intermediate erythroid precursors (Fig. 1b). A meta-analysis of all intersected open  
153 chromatin regions showed multiple trajectories of accessibility, including persistent  
154 nucleosome depletion, progenitor specific accessibility, and terminal or transient accessibility  
155 (Supplementary Figs. 5,6). While overall enrichment of predicted causal variants is strongest  
156 in intermediate erythroid cells (day 10-13), RBC traits may also be influenced by variants  
157 acting at earlier stages of erythropoiesis.

158

### 159 **Meta-genomic and machine learning approaches effectively prioritise causal variants.**

160 As both causal and non-causal variants fall within open chromatin, further assessment of  
161 their potential to alter the function of the underlying regulatory elements is required. We  
162 applied a combination of meta-genomics and machine learning to further characterise  
163 variants found within open chromatin in erythroid cells. Regulatory variants are likely to act  
164 by altering the dynamics of transcription factor binding, however only 10-20% of causal  
165 SNPs directly alter known transcription factor motifs<sup>35</sup>. This suggests that causal variants  
166 may either play an unexplained mechanistic role, or act through uncharacterised  
167 transcription factors. Sasquatch uses an unbiased approach to measure the average *in vivo*  
168 DNaseI-seq footprint for any given sequence in a specific cell type<sup>20</sup>, thus identifying likely  
169 transcription factor binding sites for both known and unknown transcription factors, and can  
170 therefore be used to evaluate variants in an unbiased manner (Fig. 2a). Using Sasquatch,  
171 we found 61.8% of variants in open chromatin in committed erythroid cells were predicted to  
172 have at least a weak effect on transcription factor footprints (762/1,233), accounting for  
173 variants at ~57% of RBC LD regions (Supplementary Fig. 7). While some of these changes  
174 were found in or adjacent to known haematopoietic transcription factors, including SCL/TAL,  
175 GATA1, SPI1/PU1, NF-E2, BACH1, and MAFK, footprint changes were also seen for motifs  
176 with no known associated transcription factor (Fig. 2, Supplementary Figs. 7,8).

177

178 Changes in specific transcription factor binding predicted by Sasquatch were validated by  
179 analysis of heterozygous variants using ChIP-seq. Notably, for rs3747093 which falls within  
180 an SCL/TAL binding motif, significant allelic imbalance was seen in erythroid SCL/TAL ChIP-  
181 seq in three independent datasets (Fig. 2b-c). Similarly, rs77222982 which is directly

182 adjacent to an AGATAA motif showed allelic imbalance in GATA1 binding (Fig. 2d-e). Often,  
183 skew in enrichment was seen across more than one factor in elements affected by a single  
184 variant, probably reflecting co-dependency in their binding (Supplementary Fig. 8). Such  
185 imbalance is consistent with the alteration of binding predicted by Sasquatch, demonstrating  
186 its ability to accurately detect causative variants.

187

188 Convolved neural network based machine learning can predict open chromatin<sup>36,37</sup> and was  
189 also used to identify causal variants. We used 936 chromatin-accessibility and epigenetic  
190 datasets to train a deep convoluted neural network, deepHaem<sup>21</sup>, to predict chromatin  
191 accessibility based on DNA sequence across haematological cell-types (Fig. 3a,  
192 Supplementary Fig. 9a-d). Using deepHaem it is possible to predict the effect of variants on  
193 chromatin accessibility. DeepHaem identified 91 variants in open chromatin with changes  
194 greater than 10% of the maximum accessibility score (1.0), with the strongest effects seen in  
195 MEP and erythroid populations (Fig. 3b). 45 of the variants predicted to alter chromatin-  
196 accessibility had scores greater than 0.1 in erythroid cells. Using ATAC-seq, we identified  
197 heterozygous alleles for 15 of these 45 variants in three healthy individuals. Comparison of  
198 sequencing from these alleles showed significant bias in ATAC-seq accessibility at 7 of the  
199 sites and skew at a further 5 sites (Fig. 3c, Supplementary Fig. 9e) indicating that  
200 deepHaem can accurately predict variant-induced changes in chromatin accessibility.

201

202 To assess how well the platform performed at identifying causative regulatory variants we  
203 used previously characterised RBC trait variants. Currently, no RBC trait variants have been  
204 definitively shown to be causative using direct *in vivo* modelling; however, eight regulatory  
205 variants have strong support from functional assays<sup>12-16</sup>. The approach established here  
206 identified that seven of these eight variants lie in open chromatin in erythroid cells, and  
207 therefore had the potential to be regulatory causal variants. Characterisation with Sasquatch  
208 or deepHaem further prioritised six of these variants as likely to be causative  
209 (Supplementary Table 1). Therefore, the platform accurately prioritises causal variants, and  
210 thus identifies variants for functional analysis.

211

## 212 **A comprehensive search for all causal variants within an RBC GWAS.**

213 The first major RBC trait GWAS identified 75 index SNPs<sup>11</sup>; the associations identified in that  
214 study are likely to represent the most common variants with moderate effect sizes and some  
215 rare variants with large effect sizes, therefore we focused specifically on this dataset for in-  
216 depth follow-up. A comprehensive GWAS decoding platform must prioritise causal variants  
217 by treating all mechanisms as plausible. By examination of the 75 index SNPs, as well as  
218 variants in high LD with them ( $r^2 \geq 0.8$ , 1000 Genomes Project;  $n=6,420$ ), we identified 486

219 candidate regulatory variants within 61 of the 75 chromosome regions. In addition to  
220 regulatory variants, we considered the possibility for coding and splicing changes across  
221 these regions. Putative coding sequence changes were identified using ANNOVAR<sup>17</sup> and  
222 then filtered for erythroid expressed genes. This identified 20 variants predicted to alter  
223 protein sequence at 14 regions (Supplementary Table 1B). Next, putative alternative-splicing  
224 variants were identified using a combination of Splicing Index<sup>18</sup> and a deep learning  
225 approach, SpliceAI<sup>19</sup>. Together, these programmes identified 13 putative splice-altering  
226 SNPs in 11 erythroid expressed genes across nine regions; however, no variants were  
227 highlighted by both algorithms (Supplementary Table 1B). Using these integrated analyses  
228 for coding, splicing and regulatory mechanisms we identified candidate causal variants at 63  
229 of the 75 chromosome regions, with 43 of these having three or fewer strong candidates,  
230 and the majority of candidates being in tight linkage ( $r^2 \geq 0.9$ ;  $n=394/515$ ) with their index SNP  
231 (Fig. 4, Supplementary Figs. 10,11a).

232  
233 We next considered why no causal variants were predicted for 12 chromosome regions.  
234 Immediate possibilities are that the variant affects gene function in a way that is currently  
235 unrecognised, or exerts effects in an untested cell type. Consistently, rs855791, also  
236 identified in GWAS for iron status, haemoglobin levels, and erythrocyte volume<sup>38,39</sup>, is a  
237 missense variant of *TMPRSS6*. *TMPRSS6* is expressed in the liver and encodes Matrilysin-  
238 2, a suppressor of the iron homeostasis master regulator, Heparin-binding epidermal growth factor  
239 that the causal variant affects mRNA stability. However, there are currently no good  
240 predictive software programmes for this. Finally, it may be that causal variants were not  
241 identified because the initial GWAS study was not sufficiently powered or used a sub-optimal  
242 catalogue of variants; resulting in incompletely resolved genetics. Indeed, index SNPs in  
243 unresolved loci were less likely to be replicated in subsequent RBC trait GWAS<sup>10,42</sup> than  
244 index SNPs at resolved loci (Supplementary Fig. 11b). Additionally, in a region with multiple  
245 unlinked causal variants, incompletely resolved genetics can lead to index SNPs being  
246 identified through weak association ( $r^2 < 0.8$ ) with two or more causal variants. Such index  
247 SNPs are referred to as tag SNPs<sup>43</sup> (Supplementary Fig. 11a). At the *TMCC2* locus, where  
248 rs9660992 is an index SNP<sup>11</sup>, moderate linkage ( $r^2 = 0.51-0.82$ ) is seen with two independent  
249 index SNPs from a subsequent RBC trait GWAS<sup>10</sup>. While rs12137294 and rs1172129 are  
250 themselves unlinked ( $r^2 = 0.46$ ), each is in tight linkage with several variants in open  
251 chromatin (Supplementary Fig. 12); suggesting rs9660992 may be a tag SNP. Therefore,  
252 both additional cell types and incomplete genetics can explain unresolved regions.

253  
254  
255



256 **High resolution 3C mapping accurately identifies effector genes.**

257 The target or effector genes for splicing and coding variants can be directly inferred, but the  
258 effector genes of regulatory variants must be identified experimentally. For enhancers to  
259 regulate gene expression they often physically interact with target promoters, likely through  
260 loop-extrusion and/or phase-separation<sup>44,45</sup>. The close proximity required for regulation can  
261 be identified by chromosome conformation capture (3C) to map interactions<sup>46</sup> and this  
262 provides a means by which to identify effector genes. NG Capture-C uses biotinylated  
263 oligonucleotide probes to target specific loci at high resolution in multiplexed 3C samples<sup>23</sup>;  
264 allowing statistical comparison for identification of enhancer-promoter interactions. We  
265 designed probes for 214 variant containing *cis*-regulatory elements covering 53/61  
266 chromosome regions with putative regulatory variants; then simultaneously generated 3C  
267 interaction data in intermediate erythroid cells, H1-hESCs and HUVECs to link *cis*-regulatory  
268 elements with their effector genes. Using a combination of tissue-specificity (DESeq2)<sup>23</sup>,  
269 Bayesian modelling (PeakY)<sup>47</sup>, and promoter proximity ( $\leq 5$  kb) to call variant-promoter  
270 interactions we identified 194 candidate effector genes at 48 of the 53 targeted regions (Fig.  
271 5a-b, Supplementary Table 1). For each targeted region, NG Capture-C identified an  
272 average of four genes, which is consistent with the predicted number of gene targets for  
273 enhancers<sup>48-50</sup>, though whether multiple genes contribute to a GWAS trait at a single locus  
274 remains to be determined. Although some methods have indicated that GWAS variants are  
275 most frequently found within 20 kb of their target genes<sup>51</sup> we detected interactions up to 992  
276 kb, with a median distance of 83.9 kb ( $\pm 9.3$  kb SE, Fig. 5c). Such long-range interactions  
277 were seen at several well characterised erythroid loci including *CITED2* (139 kb), *SLC4A1*  
278 (47 kb), *RBM38* (24 kb), *ANK1* (25 kb), *MYB* (85 kb), and *HBA1/2* (63 kb), showing that  
279 GWAS variants, as for other enhancer-promoter interactions, may act over large distances  
280 (Fig. 5d, Supplementary Figs. 13-18).

281  
282 The erythroid system and RBC traits have been intensively analysed and characterised;  
283 therefore, we were able generate a set of the 24 “most likely” effector genes within the 53  
284 targeted chromosome regions based on prior knowledge of their function (Supplementary  
285 Fig. 19a). This set of genes allowed us to benchmark our approach; finding that with NG  
286 Capture-C we correctly identified 22 of the 24 most-likely effector genes (Fig. 5a,  
287 Supplementary Fig 19b). Of the remaining regions, no genes were identified at one (*miR-*  
288 *181a*), and four incorrect candidates were identified in the region where *TAL1* is almost  
289 certainly the effector. With these exceptions, NG Capture-C performs with a high rate of  
290 success in identifying effector genes linked to potential causal variants. Three previous  
291 attempts with diverse methods to identify effector genes associated with RBC traits have  
292 been reported<sup>5,6,11</sup>. These were an annotation-based approach<sup>11</sup>, Promoter Capture-HiC<sup>5</sup>

293 (PC-HiC), and a gene-centric shRNA screen<sup>6</sup>. We directly compared these different  
294 approaches with NG Capture-C. There was little consistency between the candidate gene  
295 lists from these approaches (Supplementary Fig. 19c), with NG Capture-C the only method  
296 to identify *HBA-1/2*, the  $\alpha$ -globin encoding genes, which are known to be associated with  
297 anaemia and changes in RBC traits<sup>52</sup> (Supplementary Figs. 17,19c). Our approach was also  
298 unique in identifying *RPL19*, of interest because ribosomal genes are known to cause  
299 Diamond-Blackfan anaemia<sup>53</sup>. Across the 24 benchmark regions, NG Capture-C and the  
300 annotation-based approach were the most sensitive methods, respectively identifying 91.7%  
301 and 70.8% of the most-likely effector genes correctly (Supplementary Fig. 19 b,d). Overall,  
302 the direct comparison of different gene identification methods shows that NG Capture-C is  
303 the most successful tool.

304

### 305 **Direct modelling of rs9349205 shows reduced expression of its target gene *CCND3*.**

306 The most direct evidence that a particular variant alters gene expression comes from  
307 introducing both alleles to an isogenic background and observing an appropriate change in  
308 the relevant cell type. Previous studies characterising RBC trait variants have used reporter  
309 assays and/or targeted deletions of the regulatory element<sup>13-16</sup>. However, these may not  
310 faithfully recapitulate variants effects *in vivo*. Therefore, we used CRISPR/Cas9-facilitated  
311 homology directed repair (HDR) to directly model prioritised variants at five GWAS regions in  
312 the Human Umbilical Derived Erythroid Progenitor (HUDEP-2) cell line (Supplementary Fig.  
313 20,21); a model of human erythroid differentiation and maturation<sup>54,55</sup>. As previous studies  
314 have shown some clonal variation when using such cells<sup>56</sup> it is essential to analyse multiple  
315 independently isolated clones. We were able to generate sufficient independent clones for  
316 robust analysis of two regions (*CCND3* and *JAK2*).

317

318 Using our platform, rs9349205 was identified as tightly linked to the index SNP (rs9349204,  
319  $r^2=0.841$ ); rs9349205 is the only one of ten linked variants which lies within open chromatin  
320 in committed erythroid cells, and shows 3C interaction with *CCND3* (Fig. 6a), which is the  
321 most-likely effector gene<sup>16</sup>. rs9349205 also had small effects on both the Sasquatch DNaseI  
322 footprint and deepHaem chromatin openness scores (Supplementary Figs. 20,22a). Editing  
323 was used to convert rs9349205<sup>AA</sup> HUDEP-2 cells to rs9349205<sup>GG</sup>; a non-erythroid locus  
324 was also edited to control for non-specific effects from editing (e.g. spontaneous  
325 differentiation). Using ATAC-seq to assess chromatin accessibility, we found that the  
326 identified regulatory element in the rs9349205<sup>GG</sup> genotype was 54.5% less accessible than  
327 in rs9349205<sup>AA</sup> cells (Fig. 6b, Supplementary Fig. 22b). The rs9349205<sup>GG</sup> clones also  
328 showed significantly reduced *CCND3* expression during erythroid differentiation (Fig. 6c). As  
329 previously discussed<sup>16</sup>, *CCND3* regulates the G2 to S transition during erythropoiesis, and

330 thus knockout of *CCND3* in mice leads to an increased erythrocyte volume, consistent with  
331 linkage to changes in mean cell volume (MCV) detected through GWAS.

332

333 **rs10758656 causes reductions in chromatin accessibility and *JAK2* expression.**

334 Using NG Capture-C we identified *JAK2*, which encodes Janus Kinase 2, as an effector  
335 gene for variants in high LD with the index SNP rs2236496. We confirmed this interaction  
336 using NG Capture-C from the *JAK2* promoter (Fig. 7a). Of the 18 linked variants, only two,  
337 rs10758656 and rs10739069, intersect open chromatin. Of these two SNPs Sasquatch  
338 characterised rs10758656 but not rs10739069 as having the potential to affect transcription  
339 factor binding, with the motif strongly matching that of the GATA1 binding motif (Fig. 7b,  
340 Supplementary Fig. 23a). DeepHaem also predicted that rs10758656 but not rs10739069  
341 would affect chromatin accessibility. Therefore, HUDEP-2 cells, which are heterozygous A/G  
342 for rs10758656, were edited to homozygosity. We generated 16 independent clones  
343 homozygous for either A (n=10) or G (n=6). ATAC-seq of these cells during expansion and  
344 differentiation showed up to 82% ablation of open chromatin in the rs10758656<sup>G/G</sup> clones,  
345 associated with 86.2% and 58.4% reductions in GATA1 binding and H3K27ac, respectively  
346 (Fig. 8a-b, Supplementary Figs. 24b-e). These findings match the prediction of both  
347 Sasquatch and deepHaem. Despite being closer to the promoter of *RCL1* than *JAK2*,  
348 rs10758656<sup>G/G</sup> specifically reduced expression of *JAK2* (Fig. 8c, Supplementary Fig. 24f,g),  
349 consistent with the specificity of the rs10758656-*JAK2* interaction profile seen in NG  
350 Capture-C. *JAK2* functions as part of the erythropoietin signalling pathway<sup>57</sup>. Our results  
351 demonstrate that *JAK2* is a GWAS effector gene and most likely results in changes to the  
352 MCV noted in GWAS through altered signalling responses.

## 353 DISCUSSION

354 Here we have developed and validated a platform to identify causative GWAS variants and  
355 link them to the genes whose function they affect. In our platform ATAC-seq analysis allows  
356 researchers to identify relevant cell types using the fundamental regulatory elements of the  
357 genome: enhancers, promoters and boundary elements. GWAS variants are then assessed  
358 *in silico* to predict which variants are likely to alter gene expression or function. Candidate  
359 regulatory variants are finally linked to their effector genes using NG Capture-C. Using this  
360 method to analyse variants in high LD to RBC trait index SNPs resulted in identification of  
361 candidate causal variants and effector genes at a majority of chromosome regions (>70%).  
362 Benchmarking also shows that this approach is robust, with 88% of validated causal  
363 variants, and 92% of most-likely effector genes identified. Application of this method to fine-  
364 mapped GWAS variants is likely to further improve its success. Finally, the functional effects  
365 of candidate polymorphisms can then be assessed using allele-specific assays of chromatin  
366 accessibility and gene expression.

367  
368 This platform has been developed and benchmarked using data from purified  
369 haematopoietic cells at various stages of commitment, differentiation and maturation along  
370 the erythroid pathway to producing RBC. Using haematopoiesis as a model, we show how  
371 causal variants can be assigned to the cell types in which they exert their effects and the  
372 genes whose expression is perturbed. In principle, this method could be used for any GWAS  
373 datasets for which appropriate cell types are available. To ensure that this would apply to  
374 rare cell types and a wide range of diseases, we have established a platform that can be  
375 effectively applied using as few as 500 cells for ATAC-seq and 20,000 cells for NG Capture-  
376 C<sup>24,58</sup>. These data can then be used to improve *in silico* processing and machine learning,  
377 meaning that damaging changes can be predicted and prioritised using data from rare cells  
378 and those grown under varying conditions of stimulation.

379  
380 Linking variants to their effector genes using NG Capture-C can easily and reproducibly be  
381 applied across a wide range of cell-types at hundreds of specifically targeted sites in either  
382 gene- or enhancer- centric designs<sup>22,23</sup>. The ability to compare 3C data from multiple cell  
383 types allows tissue-specific and tissue-invariant interactions to be called by a wide range of  
384 statistical approaches<sup>23,47,59-61</sup>, increasing the throughput of accurate effector gene  
385 identification. These candidates can then be validated with functional follow-up, such as  
386 screening approaches<sup>6</sup>, or as shown here, *in vivo* modelling, to help to explain associated  
387 cellular phenotypes.

388

389 In addition to elucidating the genes involved at GWAS regions, we have also addressed the  
390 multiple molecular mechanisms that may underlie such signals. To date, strong evidence  
391 supports a mixture of coding, splicing and regulatory mechanisms<sup>62</sup>. The approach  
392 described here identifies enhancer, promoter, RNA processing and coding variants. Despite  
393 this we were still unable to identify causative variants at 16% of chromosome regions. This  
394 could partly have resulted from the fact that initial variant identification used linkage  
395 disequilibrium, which could be improved with either fine mapping or whole genome  
396 sequencing<sup>62,63</sup>. Nevertheless, other factors are also likely to contribute. The cell types  
397 affected in any complex disease are not necessarily the most obvious candidates. For RBC  
398 traits, the most likely affected lineage is erythropoiesis itself. However, other cell types  
399 modify erythropoiesis, including those producing growth factors, cytokines, or mediating  
400 cell/cell interactions such as macrophages that facilitate enucleation of RBC precursors.  
401 Furthermore, causal variants may act in the identified cell type, but only in response to  
402 specific environmental cues or signalling. Therefore, platforms such as this must be  
403 implemented with a comprehensive appreciation of the systems involved. It is also important  
404 to consider that additional untested molecular mechanisms may underlie GWAS signals.  
405 Although we found no specific enrichment for variants in CTCF elements, numerous were  
406 within CTCF peaks. Recent evidence has shown that disruption of CTCF binding by  
407 common variants plays a role in determining the severity of influenza and breast cancer<sup>64,65</sup>,  
408 thus it likely represents a less common, yet important molecular mechanism. Additionally,  
409 modelling of rs10758656 showed near complete loss of open chromatin. It is equally  
410 possible that some variants generate, rather than abolish, open chromatin sites. Such a  
411 variant has already been described as causing anaemia at the  $\alpha$ -globin locus<sup>66</sup>. These sites  
412 could only be detected by analysis of individuals with the correct genotype.

413

414 Although this integrative platform efficiently identifies variants and genes, it shifts the  
415 bottleneck of GWAS follow-up to validation. Using direct *in vivo* modelling we have shown  
416 how alleles can alter enhancers and gene expression to different extents. Although we have  
417 shown in principle that prioritised variants can be proven to be functionally causative it  
418 requires an HDR editable cell type, is labour intensive, and does not work at all loci; this step  
419 will require rapid single base editing to enable significant progress. We expect that with the  
420 implementation of integrative platforms such as this, and with ongoing advancement of  
421 molecular techniques and editing technologies the benefits of GWAS for understanding  
422 human physiology and improving health will accelerate.

## 423 **METHODS**

424 *Separation of blood cells:* Fresh blood was sourced either as whole blood collected from  
425 three healthy donors (two males, one female) using EDTA Vacuettes (Becton Dickson) or 5  
426 ml leukocyte cones (NHS Blood & Transport). Whole cell counts were performed on a  
427 Pentra ES60 (Horiba) for donor blood to ensure clinically healthy red blood cell counts  
428 (Supplementary Fig. 2). Blood was diluted with PBS and overlaid onto Histopaque-1077  
429 (Sigma) and centrifuged for 30 min at 630 rcf (no brake). Peripheral Blood Mononuclear  
430 Cells (PBMCs) were washed in PBS and MACS buffer (PBS, 2  $\mu$ M EDTA, 0.5% BSA) and  
431 stained with Human CD34 Microbead kit (Miltenyi Biotec) following the manufacturer's  
432 instruction for 30 minutes (4 °C) before being passed successively through two LS Columns  
433 (Miltenyi Biotec) with three MACs buffer washes. Counting of cells was performed on a Luna  
434 FL (Logos) after staining with acridine orange (AO) and propidium iodide (PI). CD34<sup>+</sup> cells  
435 were either stored in freezing buffer (90% FBS, 10% DMSO) or resuspended in Phase I  
436 medium for a three-phase differentiation<sup>9</sup>. CD34<sup>+</sup> depleted PBMCs were then sequentially  
437 stained and passed over LS or MS columns for selective purification of CD8<sup>+</sup>, CD14<sup>+</sup>,  
438 CD4<sup>+</sup>, CD19<sup>+</sup> and, NK cell populations using cell-type specific kits (Miltenyi Biotec). For NK  
439 cells, non-NK cells were first blocked with a biotin-antibody cocktail before binding to NK  
440 microbeads following the manufactures instructions.

441  
442 *Differentiation of CD34<sup>+</sup> cells:* Cells were differentiated under a three phase *ex vivo* protocol  
443 adapted from that used for the BEL-A cell line<sup>7,9,67</sup>. Growth media are listed in  
444 Supplementary Table 2. Briefly, for differentiation 0.5-2.5x10<sup>5</sup> cells were resuspended on  
445 day 0 in Phase I media at 10<sup>5</sup> cells ml<sup>-1</sup>. Cell counts were performed on days 3 and 5 with  
446 additional Phase I media added to return the concentration to 10<sup>5</sup> cells ml<sup>-1</sup>. On day 7, cells  
447 were counted and pelleted (400 rcf, 5 min, RT) and resuspended in Phase II media at 3x10<sup>5</sup>  
448 cells ml<sup>-1</sup>. Cells were counted on day 9 and diluted to 3x10<sup>5</sup> cells ml<sup>-1</sup> Phase II media. On  
449 day 11, cells were counted and pelleted (400 rcf, 5 min, RT) and resuspended in Phase III  
450 media at 10<sup>6</sup> cells ml<sup>-1</sup>. Cells were counted on days 13 and 15 and diluted to 10<sup>6</sup> cells ml<sup>-1</sup> in  
451 Phase III media. Reproducibility between differentiations was confirmed morphologically with  
452 cytopins, immunologically with six FACS cell surface markers and epigenetically with  
453 ATAC-seq enhancer staging<sup>24</sup>. For morphological analyses 10<sup>5</sup> cells were resuspended in  
454 200 ml PBS and spun (5 min, 400 rpm) in a Cytospin 4 (ThermoFisher), before staining with  
455 modified Wright's Stain on a Hematek (Bayer Health Care), and mounting with DPX (Sigma).  
456 Images were taken on an Olympus BX 60 microscope at 10x and 20x magnification. For  
457 differentiation and enucleation FACS analyses 10<sup>5</sup> cells were resuspended in FACS buffer  
458 (90 % PBS, 10 % FBS) and stained with an erythroid differentiation panel of antibodies  
459 (Supplementary Table 4) against CD34, CD36/Fatty acid translocase, CD235a/Glycophorin

460 A, CD71/Transferrin Receptor, CD233/Band3, CD49d/ $\alpha$ -Integrin, and with Hoescht-33258  
461 (ThermoFisher) for live/dead analysis, with Hoescht-33342 (ThermoFisher) for enucleation  
462 assays. For immune cell purities, cells were stained with cell-type specific panels of  
463 antibodies (Supplementary Fig. 25, Supplementary Table 4). FACS was carried out on an  
464 Attune NxT (ThermoFisher), voltages and compensation were set using Ultra Comp eBeads  
465 (ThermoFisher) for antibodies, and single stained cells for dyes. Gating was performed using  
466 fluorescence minus one (FMO) controls. Analysis was performed using either Attune NxT  
467 software (v3.0) or FlowJo (v10.4.2).

468  
469 *Cell line culture and HUDEP-2 differentiation:* Human ESC line H1 (H1-hESC; WiCell) was  
470 grown on Matrigel (Corning) coated plates in mTeSR1 medium (StemCell technologies).  
471 Cells were harvested as a single cell suspension using Accutase (EDM Millipore); ATAC-seq  
472 and fixation were carried out in mTeSR1 medium. Primary neonatal Human Umbilical Vein  
473 Endothelial Cells (HUVEC) were sourced from three suppliers to provide genetic diversity  
474 (Lonza, Gibco, PromoCell). HUVECs were expanded in endothelial cell growth medium  
475 (Sigma) up to five passages following the manufacturer's protocol. Briefly, HUVECs were  
476 grown to 60% confluence, washed with HBSS at room temperature and sub-cultured  
477 following light trypsination using Trypsin-EDTA (Sigma) at room temperature and terminating  
478 the reaction with trypsin inhibitor (Sigma) upon rounding of the cells and gentle release from  
479 the flask. HUVECs were fixed in RPMI supplemented with 10 % FBS. Human Umbilical  
480 Derived Erythroid Progenitor line 2 cells<sup>54</sup> (HUDEP-2; RIKEN) were maintained at 0.7-  
481  $1.5 \times 10^6$  cells ml<sup>-1</sup> in HUDEP expansion media (SFEM, 50 ng/ml SCF, 3 IU/ml EPO, 10  $\mu$ M  
482 DEX, 1% L-Glu, 1% Penstrep) and changed into fresh media containing 2x doxycycline  
483 (DOX) every two days. For differentiation we used a modified version of the CD34  
484 differentiation protocol.  $2-3 \times 10^6$  cells were resuspended at  $0.3-0.5 \times 10^6$  cells ml<sup>-1</sup> in HUDEP  
485 Phase I media (IMDM, 200  $\mu$ g/ml Holotransferrin, 10 g/ml Insulin, 3 IU/ml Heparin, 3%  
486 Inactivated AB plasma, 2% FBS, 3 IU/ml EPO, 1 ng/ml IL-3, 10 ng/ml SCF, 1x Pen/Strep)  
487 with 1x DOX on day 0. On days 1 and 3 cells were counted, pelleted (5 min, 250 rcf, RT)  
488 and resuspended to  $0.3-0.5 \times 10^6$  cells ml<sup>-1</sup> in fresh HUDEP Phase I media supplemented with  
489 2x DOX. On day 5, cells were counted, pelleted and resuspended to  $0.5 \times 10^6$  cells ml<sup>-1</sup> in  
490 HUDEP Phase II media (IMDM, 500  $\mu$ g/ml Holotransferrin, 10 g/ml Insulin, 3 IU/ml Heparin,  
491 3% Inactivated AB plasma, 2% FBS, 3 IU/ml EPO, 1x Pen/Strep) without DOX. On days 7  
492 and 9 cells were counted, pelleted and resuspended to  $0.5 \times 10^6$  cells ml<sup>-1</sup> in fresh HUDEP  
493 Phase II media. Cytospins and FACS was carried out as for CD34<sup>+</sup> differentiation.

494  
495 *HUDEP-2 genome editing:* Prior to guide RNA (gRNA) design HUDEP-2 SNPs were  
496 genotyped by either Sanger or Next Generation sequencing at MRC WIMM Sequencing

497 Facility with locus specific primers (Supplementary Table 3). For introduction of SNPs by  
498 CRISPR/Cas9 facilitated homology dependent repair (HDR), gRNAs were designed to cut in  
499 close proximity to the SNP of interest with the PAM overlapping the SNP where possible,  
500 additionally single stranded DNA donors (ssODN; IDT) were offset and thioated to promote  
501 integration and reduce degradation. To control for global effects on HUDEP-2 cells caused  
502 by CRISPR/Cas9 editing, gRNA and ssODN were designed for a homozygous SNP  
503 (rs4508712) with no GWAS associations ([www.ebi.ac.uk/gwas](http://www.ebi.ac.uk/gwas)), and was not within an  
504 erythroid regulatory element or expressed gene. HUDEP-2 genotype specific gRNAs  
505 (Merck) were cloned into pX458 plasmid backbone<sup>68</sup> by the Genome Engineering Facility  
506 (WIMM, University of Oxford) and purified using Plasmid Midi Kit (Qiagen). pX458  
507 (pSpCas9(BB)-2A-GFP) was a gift from Feng Zhang and is available from Addgene (plasmid  
508 #48138). HUDEP-2 cells were then transfected as previously described<sup>55</sup>. Briefly,  $\sim 1 \times 10^6$   
509 cells were transfected with pairs of 5  $\mu$ g gRNA plasmid and 4  $\mu$ g ssODN (Supplementary  
510 Table 3) using Amaxa<sup>TM</sup> Human CD34 Cell Nucleofector<sup>TM</sup> Kit (Lonza) in the 2B-  
511 Nucleofector<sup>TM</sup> on the U-08 setting. Cells were transferred to 2.5 ml HUDEP expansion  
512 media supplemented with 2x DOX and 7.5  $\mu$ M RAD51-stimulatory compound 1 (RS-1,  
513 Sigma). After two days cells were pelleted (5 min, 250 rcf, room temp.) and resuspended in  
514 2.5 ml HUDEP expansion media supplemented with 2x DOX with minimal light exposure. On  
515 day 3 cells were single cell sorted on BD FACSAria Fusion flow cytometers (BD Bioscience)  
516 into terazaki plates containing 20  $\mu$ l of expansion media (2x DOX). When colonies reached  
517 more than 30 cells they were transferred to a 96-well plate and expanded over two weeks  
518 with fresh media and DOX every 2 days until filling two to four wells of a 96-well plate. Half  
519 of the cells for each expanded clone were frozen (90% FBS, 10% DMSO) as a stock for  
520 recovery post genotyping. For genotyping we followed a 96-well barcoding approach with  
521 Next Generation sequencing<sup>69</sup>. Clonally amplified cells were first lysed (50 mM Tris, 1 mM  
522 EDTA, 0.5% Tween 20) and the targeted locus was amplified with primers containing a  
523 modified m13 adaptor sequence (Supplementary Table 3), the adaptor was then used to for  
524 priming with row and column specific primers in a second PCR to barcode each well. Finally,  
525 all wells from a single plate were pooled and prepared for sequencing with the NEBNext  
526 Ultra II DNA Library Prep kit for Illumina (New England Biolabs). Plates were multiplexed  
527 and sequenced on the MiSeq platform (Illumina) using 250 bp paired-end reads (Nano kit,  
528 v2 chemistry). Sequences were analysed using platescreen96<sup>69</sup> (v4.0.4,  
529 [github.com/Hughes-Genome-Group/plateScreen96/releases](https://github.com/Hughes-Genome-Group/plateScreen96/releases)) to genotype clones. Screening  
530 was carried out to exclude clones which appeared homozygous due to microhomology  
531 driven large deletions (200-4,000 bp)<sup>70,71</sup> rather than HDR by PCR with locus specific  
532 primers (Supplementary Table 3) for rs9349205 and rs4508712. For rs10758656, two



533 upstream heterozygous SNPs rs7870037 (+129 bp) & rs7855081 (+132 bp) allowed for the  
534 exclusion of loss of heterozygosity.

535

536 *Gene expression analyses:*  $1\text{-}5 \times 10^6$  cells were fixed in 1 ml TRI-reagent (Sigma), snap  
537 frozen and stored at  $-80^\circ\text{C}$  for less than one year. RNA was extracted by addition of 0.1 ml  
538 1-bromo-3-chloropropane, pipette mixing and separation in a Phase Lock gel Heavy tube  
539 (5Prime) and then precipitation with 1  $\mu\text{l}$  of GlycoBlue and an equal volume ( $\sim 500 \mu\text{l}$ )  
540 isopropanol and centrifugation (10 min, 12,000 rcf,  $4^\circ\text{C}$ ). The RNA pellet was washed with  
541 75% ethanol, resuspended in DEPC-treated water, and stored at  $-80^\circ\text{C}$  for less than one  
542 year. For RT-qPCR RNA was treated with 2U of rDNase I (Invitrogen) and then 1  $\mu\text{g}$  of RNA  
543 was used to generate cDNA using SuperScript III First Strand Synthesis SuperMix  
544 (Invitrogen) following the manufacturers' instructions. Real-time RT-qPCR was performed on  
545 a StepOne Thermocycler (ThermoFisher) using Taqman Universal PCR Master Mix II (Life  
546 Tech) and commercially available expression assays (Supplementary Table 5; Life Tech).  
547 For RNA-seq total RNA was treated with Turbo DNase (Invitrogen) at  $25^\circ\text{C}$  for 60 min, then  
548 RNA was separated using phenol-chloroform isoamylalcohol and a PhaseLock Light-gel  
549 tube (5Prime). Treated RNA was precipitated at  $-80^\circ\text{C}$  overnight with sodium acetate,  
550 glycoblu, and 75% ethanol, before centrifugation (12,000 rcf,  $4^\circ\text{C}$ ), 75% ethanol wash and  
551 resuspension in DEPC-treated water. Globin and rRNA sequences were depleted from up to  
552 5  $\mu\text{g}$  of treated RNA using Globin-Zero Gold (Illumina), before PolyA selection with NEBNext  
553 Poly(A) mRNA Magnetic Isolation module (New England Biolabs), and indexing with  
554 NEBNext Ultra Directional RNA Library Prep Kit for Illumina (New England Biolabs) following  
555 the manufacturers' instructions. RNA-seq libraries were quantified by qPCR (KAPA) prior to  
556 sequencing on the NextSeq platform (Illumina) with 39 bp paired-end reads. Reads were  
557 mapped to hg19 (Supplementary Table 6) using STAR<sup>72</sup> (v2.4.2a; --outFilterMultimapNmax  
558 1) and duplicates were filtered using samtools<sup>73</sup> (v1.3; rmdup). For visualisation directional  
559 reads were normalised to RPKM using deepTools<sup>74</sup> with no windowing (v2.2.2;  
560 bamCoverage --binSize 1 --normalizeUsingRPKM). Uniquely mapped reads were analysed  
561 in DESeq2<sup>61</sup> using variance stabilising transformation and exclusion of genes lacking 5 total  
562 reads. Violin plots were with the R package generated in ggplot2<sup>75</sup>. Expressed genes were  
563 classed as having more than  $\log_2(\text{FPKM})$  greater than -5.

564

565 *Chromatin conformation capture and target gene identification:* For chromatin conformation,  
566  $1\text{-}2 \times 10^7$ , H1-hESC, HUVEC or erythroid cells were crosslinked with 2% formaldehyde which  
567 provides optimal *cis/trans* ratios and digestion efficiencies<sup>58</sup>. For each cell type triplicate 3C  
568 libraries were prepared using DpnII and standard methods<sup>23</sup> with the following modifications:  
569 no douncing was performed, all spins were performed at 300 rcf, and after ligation intact

570 nuclei were pelleted (15 min, 300 rcf), supernatant was discarded, and nuclei were  
571 resuspended in 300  $\mu$ l Tris-EDTA (TE; Sigma) for phenol chloroform extraction. Digestion  
572 efficiency was determined by RT-qPCR with TaqMan and custom oligonucleotides  
573 (Supplementary Table 5), and ligation efficiency qualitatively determined by gel  
574 electrophoresis. Only 3C libraries with >70% digestion efficiencies were used. 3C libraries  
575 were sonicated to 200 bp in a Covaris S220 and indexed with NEB Next Illumina library Prep  
576 reagents (NEB). Enrichment for specific viewpoints was performed with 70mer biotinylated  
577 oligonucleotides designed using CapSequm<sup>76</sup> ([http://apps.molbiol.ox.ac.uk/CaptureC/cgi-](http://apps.molbiol.ox.ac.uk/CaptureC/cgi-bin/CapSequm.cgi)  
578 [bin/CapSequm.cgi](http://apps.molbiol.ox.ac.uk/CaptureC/cgi-bin/CapSequm.cgi)). Double capture was performed in multiplexed reactions with pools of  
579 oligonucleotides targeting either promoter proximal (within 5 kb of a transcription start site)  
580 or promoter distal *DpnII* fragments (Supplementary Table 7) following the described  
581 method<sup>23</sup> with each oligonucleotide at a working concentration of 2.9 nM. Captured 3C  
582 libraries were sequenced on the NextSeq platform (Illumina) with 150 bp paired-end reads.  
583 Reads were mapped and analysed using CCseqBasic5 ([github.com/Hughes-Genome-](https://github.com/Hughes-Genome-Group/CCseqBasic5)  
584 [Group/CCseqBasic5](https://github.com/Hughes-Genome-Group/CCseqBasic5)) as previously described<sup>77</sup> with the following custom settings (--bowtie2  
585 --globin 2). Briefly, CCseqBasic5 trims adaptor sequences, flashes read pairs, *in silico*  
586 digests fragments and uses bowtie2 to map reads before identifying capture and reporter  
587 reads. After primary analysis replicates were compared using the comprehensive  
588 CaptureCompare software ([github.com/Hughes-Genome-Group/CaptureCompare](https://github.com/Hughes-Genome-Group/CaptureCompare)).  
589 CaptureCompare normalises *cis* reporter counts per 100,000 *cis* reporters, generates per  
590 fragment mean counts for each cell type, calculates difference in mean interactions between  
591 cell types, compares differences in raw interaction counts per fragment using DESeq2<sup>45</sup> as  
592 previously described<sup>23,78,79</sup>, and provides input for peaky interaction calling<sup>47</sup>. Interaction  
593 calling using peaky was run with default settings (omega -3.8) and interactions were filtered  
594 based upon the Marginal Posterior Probability of Contact (MPPC) within local interaction  
595 domains (MPPC > 0.01) or within 1 Mb of the viewpoint (MPPC > 0.1) and assigned to either  
596 Refseq transcription start sites (tss) or variants within 500 bp of the interacting fragment.  
597 Target genes were first identified as those having a tss within 5kb of an intersecting variant  
598 (high proximity), being within 500 bp of a significantly enriched erythroid fragment (FDR  
599 <0.05) or with 500 bp of a peaky identified interaction. Candidate genes were subsequently  
600 filtered for detectable erythroid expression ( $\log_2(\text{FPKM}) > -5$ ). 24 test genes most likely to be  
601 effectors were identified based on published functional data (*IKZF1*, *KIT*, *TAL1*, *RBM38*,  
602 *SMIM1*, *CD164*, *CCND3*, *MYB*, *HBA1*, *HBA2*, *BCL11A*, *JAK2*)<sup>12-14,16,42,80</sup>, presence in the  
603 Oxford Red Cell Panel for rare inherited anaemia (*KLF1*, *TFRC*, *ANK1*, *HK1*, *SCL4A1*)<sup>81</sup>,  
604 containing mutations causing hemochromatosis (*TFR2*)<sup>82</sup>, having an erythroid eQTL  
605 (*ATP2B4*)<sup>15</sup>, and causing altered RBC phenotypes in mouse and zebrafish (*FBXO7*, *CCNA2*,  
606 *miR-181a*, *PIEZO1*, *AKAP10*, *CITED2*)<sup>83-89</sup>.

607

608 *Chromatin IP, ATAC-seq, and data processing:* For ChIP-seq, chromatin was crosslinked  
609 with 1% formaldehyde (Sigma) by the addition of 1 ml 10x crosslinking buffer (50 mM  
610 HEPES, 1 mM EDTA, 0.5 mM EGTA, 100 mM NaCl, 10% formaldehyde) to  $10^7$  cells in 9 ml  
611 of media and incubation at room temperature for 10 minutes. Crosslinking was quenched  
612 with 130 mM glycine, and cells were washed with cold PBS before snap freezing pelleted  
613 cells. Fixed material was stored at  $-80^{\circ}\text{C}$  for less than 12 months. Chromatin  
614 immunoprecipitation was performed using Agarose ChIP Assay Kit (Merck Millipore). Briefly,  
615  $10^7$  cells were lysed by incubation on ice with 130  $\mu\text{l}$  lysis buffer for 15 minutes. Lysed cells  
616 were transferred to Covaris microtubes and sonicated on the Covaris S220 (Duty cycle: 2%,  
617 Intensity: 3, Cycles per burst: 200, Power mode: Frequency sweeping, Duration: 480 sec,  
618 Temp.:  $6^{\circ}\text{C}$ ) to generate 200-400 bp fragments. Insoluble material was removed by  
619 centrifugation (15,000 rcf, 15 min,  $4^{\circ}\text{C}$ ) and soluble material was diluted to 4 ml with dilution  
620 buffer. Immunoprecipitation was performed by incubation of 2 ml diluted chromatin  
621 (equivalent to  $5 \times 10^6$  input cells) with antibodies for H3K4me1 (3  $\mu\text{g}$  ab195391, lot:  
622 GR304893-2; AbCam), H3K4me3 (1  $\mu\text{l}$  07-473, lot: 2664283; Millipore), H3K27ac (0.3  $\mu\text{g}$   
623 ab4729, lot: GR3205523-1; AbCam), CTCF (10  $\mu\text{l}$  07-729, lot: 2836929; Millipore) or GATA1  
624 ( $\sim 7.2$   $\mu\text{g}$  ab11852, lot: GR208255-9; AbCam) overnight. Chromatin binding to Protein  
625 A/agarose slurry, washes and elution were performed according to the manufacturer's  
626 instructions. DNA was purified by phenol-chloroform extraction with PhaseLock tubes  
627 (5Prime) and ethanol precipitation with NaOAc, and 2  $\mu\text{l}$  GlycoBlue (Invitrogen). ChIP  
628 enrichment was determined by RT-qPCR (Supplementary Table 5) prior to addition of  
629 sequencing adaptors using NEBNext Ultra II DNA Library Prep kit for Illumina (New England  
630 Biolabs). ATAC-seq was performed as previously described<sup>77,90</sup> using  $7 \times 10^5$  cells. ChIP-seq  
631 and ATAC-seq libraries were quantified by RT-qPCR with the KAPA Library Quantification  
632 Complete Kit (KAPA) prior to sequencing on the NextSeq platform (Illumina) with 39 bp  
633 paired-end reads. ATAC-seq, DNaseI-seq and ChIP-seq reads were mapped to the hg19  
634 genome using NGseqBasic<sup>91</sup> (V20; --nextera --blacklistFilter --noWindow) which utilises  
635 bowtie. Sequence depth and mapped reads for each sample are provided (Supplementary  
636 Table 6). Published GEO repositories<sup>24,66,92-99</sup> were used for ATAC-seq and DNaseI-seq  
637 from HSC, CMP, MEP, MPP, Ery (GSE75384), and HUVEC (GSM736575, GSM736533),  
638 and ChIP-seq for SCL/TAL (GSE95875, GSE93372, GSE42390, GSE70660, GSE59087,  
639 GSE52924), GATA1 (GSE32491, GSE36985, GSE107726, GSE29196), NF-E2  
640 (GSE95875), BACH1 and MAFK (GSE31477), and SPI1/PU1 (GSE70660) were analysed  
641 by the same method. For visualisation PCR-duplicate filtered replicates were merged using  
642 samtools<sup>73</sup> (v1.3) and converted to bigwigs with minimal smoothing using deepTools<sup>74</sup>  
643 (v2.2.2; bamCoverage --binSize 10 --normalizeUsingRPKM --minMappingQuality 30).

644

645 *Imputation and in silico analysis of variants:* The original 75 anaemia index SNPs were  
646 imputed with HapMap Phase 2 which is lower resolution than the 1000 Genomes Project  
647 Phase 3 dataset<sup>11,100</sup>. Therefore variants in linkage disequilibrium (LD) with index SNPs were  
648 identified using the rAggr proxy search online tool ([raggr.usc.edu](http://raggr.usc.edu)) with default settings  
649 ( $r^2 \geq 0.8$ , distance limit: 500 kb, population panels: All European, All South Asian) for the 1000  
650 Genomes Project Phase 3 database<sup>101</sup>, which generated 6,420 variants. LD variants for  
651 Astle *et al.* (2016) were provided by Lisa Schmunk, Tao Jiang, and Nicole Soranzo  
652 (University of Cambridge). Summary statistics for Malaria<sup>102</sup>, Multiple Sclerosis<sup>25</sup>,  
653 Inflammatory Bowel Disease<sup>27</sup>, Type 1 Diabetes<sup>26</sup>, Type 2 Diabetes<sup>103</sup>, Intelligence<sup>28</sup>, and  
654 Central Corneal Thickness<sup>29</sup> were downloaded from the NHGRI-EBI GWAS Catalog<sup>1</sup>  
655 ([www.ebi.ac.uk/gwas](http://www.ebi.ac.uk/gwas)). For comparison of linkage between index SNPs from van der Harst  
656 *et al.* (2012)<sup>11</sup> and Astle *et al.* (2016)<sup>10</sup> we used LDmatrix on the LDlink web tool<sup>104</sup>  
657 (<http://ldlink.nci.nih.gov/>) for European populations. Variants were intersected with peak calls  
658 from ATAC-seq or DNaseI-seq for each cell type of interest using bedtools<sup>105</sup>. Enrichment  
659 was calculated as the  $-\log(p\text{-value})$  of a binomial cumulative distribution function  $b(x; n, p)$ ,  
660 describing the probability of  $x$  or more successes from  $n$  Bernoulli trials, with the probability  
661 of success for each trial being  $p$ . P-values were calculated using the R function `pbinom`  
662 (`lower.tail=FALSE`) where  $x$  was the number of intersecting variants,  $n$  was the total number  
663 of variants and  $p$  was the total number of base-pairs within cell specific peaks divided by the  
664 hg19 uniquely mappable base-pairs (2,644,741,479 bp). Variants within the exons and  
665 introns of expressed coding genes were tested for predicted damaging effects on coding  
666 ANNOVAR<sup>17</sup> or splicing SPIDEX<sup>18</sup> (z-score  $\geq 1.65$ ) and SpliceAI<sup>19</sup> (AI score  $\geq 0.2$ ). Variants  
667 within open chromatin were assessed for potential damage to transcription factor binding  
668 footprints using Sasquatch<sup>20</sup> (7-mer, WIMM Fibach Erythroid, Exhaustive). Variants within  
669 open chromatin were further classified based on their predicted effect on chromatin  
670 accessibility using a deep convolutional neural net<sup>21</sup> (deepHaem). Model architecture and  
671 data encoding were adapted from DeepSEA<sup>36</sup> with the following modifications. The number  
672 of convolutional layers was increased from three to five and batch normalisation was  
673 excluded as it did not improve convergence. The network was re-implemented in python  
674 using tensorflow (v1.8.0; <https://www.tensorflow.org/about/bib>). The ENCODE data  
675 compendium previously used<sup>36</sup> was supplemented with ATAC-seq and CTCF ChIP-seq data  
676 from erythroid differentiations generated for this work, DNaseI-seq<sup>20</sup>, and ATAC-seq from  
677 sorted progenitor populations<sup>24</sup>. Full model details and architecture are available on GitHub  
678 (<https://github.com/rschwess/deepHaem>).

679

680 *Chromatin segmentation and enhancer based PCA analysis:* To ensure identification of all  
681 ATAC-seq peaks a combination of the traditional MACS2 approach<sup>106</sup> (v2.0/10 callpeak -B -q  
682 0.01) and digital signal processing with Ritornello<sup>107</sup> (v2.0 default settings) was used. Peak  
683 summits from both calls were extended to 500 bp and intersected with bedtools<sup>105</sup> (v2.25.0),  
684 and filtered for high ploidy regions in MIG viewer<sup>108</sup> to form peak calls for each cell type  
685 (Supplementary Tables 8a-p). Chromatin segmentation was performed using the  
686 GenoSTAN<sup>31</sup> hidden Markov model (HMM) which allows a more fine-tuned analysis than  
687 ChromHMM<sup>109</sup> as it uses continuous rather than binary signal counts. Segmentation used a  
688 peak centric approach, rather than signal across the whole genome, with triplicate  
689 H3K4me1, H3K4me3, H3K27ac, and CTCF from day 10 of *ex vivo* CD34 differentiation.  
690 Read coverage of each mark was calculated (deepTools v2.4.2) for 1 kb windows over open  
691 chromatin peaks (bedtools merge -d 10) to capture histone modifications. The HMM model  
692 was trained using Poisson log-normal distributions with 20 initial states. These were  
693 manually curated to 8 final states based on similarity of chromatin signature. For Principle  
694 Component Analysis (PCA) trajectory plotting combined peak calls from sorted  
695 hematopoietic populations covering 176,135 open chromatin regions not within 2 kb of  
696 transcription start sites were first used to generate a PCA map of erythroid differentiation  
697 from sorted populations of HSC, MPP, CMP, MEP and Erythroid populations<sup>24</sup>. Reads within  
698 peaks were normalised (R scale) and the PCA was calculated using the R function prcomp.  
699 The read counts from *ex vivo* differentiated cells within the same peak set were then used to  
700 calculate sample mapping onto PC1 and PC2, and thus to map differentiation timepoints  
701 onto the differentiation trajectory. Heatmaps of intersected peaks were generated with  
702 pheatmap<sup>110</sup> (v1.0.8) using z-normalised counts of reads per basepair from all identified  
703 peaks. For enhancer activity, peak calls were extended by 250 bp in both directions  
704 (bedtools slop) to account for the spreading nature of H3K27ac ChIP-seq signal, enhancers  
705 were then ranked based on reads per base pair. To determine the point of inflection between  
706 low and high acting enhancers H3K27ac read counts were transformed so that the highest  
707 value equalled the number of ranked peaks. The point of inflection where the gradient of the  
708 curve became greater than one was used to define low and high enhancer activity. The  
709 gradient was calculated based on the local linear gradient of  $\pm 200$  peaks.

710

711 *Ethics:* Blood was collected with ethics approval (MREC 03/08/097) and stored according to  
712 HTA guidelines (License 12433).

713

714 *Acknowledgements:* This work was carried out as part of the WIGWAM Consortium  
715 (Wellcome Investigation of Genome Wide Association Mechanisms) funded by a Wellcome  
716 Trust Strategic Award (106130/Z/14/Z). We appreciate the time and support of Kevin Clarke,

717 Sally-Anne Clarke and Paul Sopp (WIMM Flow Cytometry Facility, Oxford University) during  
718 cell sorting. This work was also supported by Medical Research Council (MRC) Core  
719 Funding (MC\_UU\_12009). D.J.D. received funding from the Oxford University Medical  
720 Science Internal Fund: Pump Priming (0006152). Wellcome Trust Doctoral Programmes  
721 supported R.S. (203728/Z/16/Z), C.Q.E. (203141/Z/16/Z), M.C.S (097309/Z/11/Z), A.M.O.  
722 (105281/Z/14/Z), and R.C.B. (203141/Z/16/Z). C.S. was supported by the Congenital  
723 Anaemia Network (CAN). A.M.O was supported by the Stevenson Junior Research  
724 Fellowship (University College, Oxford). J.O.J.D. is funded by an MRC Clinician Scientist  
725 Award (MR/R008108) and received Wellcome Trust Support (098931/Z/12/Z). G.L. is  
726 supported by the Wellcome Trust (090532/Z/09/Z) and MRC Strategic Alliance Funding  
727 (MC\_UU\_12025).

728

729 *Author Contributions:* D.J.D., J.K., J.O.J.D., P.H., G.L., J.A.T., S.T., V.J.B., D.R.H., and  
730 J.R.H. designed and planned experiments. D.J.D., S.J.H., L.N., C.S., M.E.G., P.P.H.,  
731 M.C.S., J.L.D., A.J.C., C.A.D., M.S.C.L., A.M.O., Y.B., A.J.K., P.H., and C.F. performed  
732 experiments. D.J.D., R.S., J.M.T., C.Q.E., S.J.M., J.R.J.I., and R.C.B. processed and  
733 analysed data. R.K., and Y.N. provided essential reagents. D.J.D., J.A.T., D.R.H, J.R.H.  
734 wrote the manuscript.

735

736 *Competing Interest Statement:* J.R.H and J.O.J.D. are founders and shareholders of  
737 Nucleome Therapeutics.

738 **REFERENCES**

- 739 1. MacArthur, J. *et al.* The new NHGRI-EBI Catalog of published genome-wide  
740 association studies (GWAS Catalog). *Nucleic Acids Res.* **45**, D896–D901 (2017).
- 741 2. Hindorff, L. A. *et al.* Potential etiologic and functional implications of genome-wide  
742 association loci for human diseases and traits. *Proc. Natl. Acad. Sci.* **106**, 9362–9367  
743 (2009).
- 744 3. Zhu, Z. *et al.* Integration of summary data from GWAS and eQTL studies predicts  
745 complex trait gene targets. *Nat. Genet.* **48**, 481–487 (2016).
- 746 4. Baxter, J. S. *et al.* Capture Hi-C identifies putative target genes at 33 breast cancer  
747 risk loci. *Nat. Commun.* **9**, (2018).
- 748 5. Javierre, B. M. *et al.* Lineage-Specific Genome Architecture Links Enhancers and  
749 Non-coding Disease Variants to Target Gene Promoters. *Cell* **167**, 1369-1384.e19  
750 (2016).
- 751 6. Nandakumar, S. K. *et al.* Gene-centric functional dissection of human genetic  
752 variation uncovers regulators of hematopoiesis. *Elife* **8**, 1–29 (2019).
- 753 7. Griffiths, R. E. *et al.* Maturing reticulocytes internalize plasma membrane in  
754 glycophorin A – containing vesicles that fuse with autophagosomes before exocytosis.  
755 *Blood* **119**, 6296–6307 (2012).
- 756 8. Ludwig, L. S. *et al.* Transcriptional States and Chromatin Accessibility Underlying  
757 Human Erythropoiesis. *CellReports* **27**, 3228-3240.e7 (2019).
- 758 9. Scott, C. *et al.* Modelling erythropoiesis in congenital dyserythropoietic anaemia type I  
759 (CDA-I). *bioRxiv* 1–27 (2019). doi:10.1101/744367
- 760 10. Astle, W. J. *et al.* The Allelic Landscape of Human Blood Cell Trait Variation and Links  
761 to Common Complex Disease. *Cell* **167**, 1415-1429.e19 (2016).
- 762 11. van der Harst, P. *et al.* Seventy-five genetic loci influencing the human red blood cell.  
763 *Nature* **492**, 369–75 (2012).
- 764 12. Stadhouders, R. *et al.* HBS1L-MYB intergenic variants modulate fetal hemoglobin via  
765 long-range MYB enhancers. *J. Clin. Invest.* **124**, 1699–1710 (2014).
- 766 13. Ulirsch, J. C. *et al.* Systematic functional dissection of common genetic variation  
767 affecting red blood cell traits. *Cell* **165**, 1530–1545 (2016).
- 768 14. Raffield, L. M. *et al.* Common  $\alpha$ -globin variants modify hematologic and other clinical  
769 phenotypes in sickle cell trait and disease. *PLoS Genet.* **14**, 1–21 (2018).
- 770 15. Lessard, S. *et al.* An erythroid-specific ATP2B4 enhancer mediates red blood cell  
771 hydration and malaria susceptibility. *J. Clin. Invest.* **127**, 3065–3074 (2017).
- 772 16. Sankaran, V. G. *et al.* Cyclin D3 coordinates the cell cycle during differentiation to  
773 regulate erythrocyte size and number. *Genes Dev.* **26**, 2075–2087 (2012).
- 774 17. Wang, K., Li, M. & Hakonarson, H. ANNOVAR: functional annotation of genetic

- 775 variants from high-throughput sequencing data. *Nucleic Acids Res.* **38**, e164 (2010).
- 776 18. Xiong, H. Y. *et al.* The human splicing code reveals new insights into the genetic  
777 determinants of disease. *Science (80-. ).* **347**, 1254806 (2015).
- 778 19. Jaganathan, K. *et al.* Predicting Splicing from Primary Sequence with Deep Learning.  
779 *Cell* **176**, 535-548.e24 (2019).
- 780 20. Schwessinger, R. *et al.* Sasquatch : predicting the impact of regulatory SNPs on  
781 transcription factor binding from cell- and tissue-specific DNase footprints. *Genome*  
782 *Res.* **27**, 1730–1742 (2017).
- 783 21. Schwessinger, R. *et al.* DeepC : Predicting chromatin interactions using megabase  
784 scaled deep neural networks and transfer learning. *bioRxiv* **724005**, (2019).
- 785 22. Davies, J. O. J., Oudelaar, A. M., Higgs, D. R. & Hughes, J. R. How best to identify  
786 chromosomal interactions: A comparison of approaches. *Nat. Methods* **14**, 125–134  
787 (2017).
- 788 23. Davies, J. O. J. *et al.* Multiplexed analysis of chromosome conformation at vastly  
789 improved sensitivity. *Nat. Methods* **13**, 74–80 (2016).
- 790 24. Corces, M. R. *et al.* Lineage-specific and single-cell chromatin accessibility charts  
791 human hematopoiesis and leukemia evolution. *Nat. Genet.* **48**, 1193–1203 (2016).
- 792 25. Beecham, A. H. *et al.* Analysis of immune-related loci identifies 48 new susceptibility  
793 variants for multiple sclerosis. *Nat. Genet.* **45**, 1353–1360 (2013).
- 794 26. Onengut-gumuscu, S. *et al.* Fine mapping of type 1 diabetes susceptibility loci and  
795 evidence for colocalization of causal variants with lymphoid gene enhancers. *Nat.*  
796 *Genet.* **47**, 381–386 (2015).
- 797 27. Liu, J. Z. *et al.* Association analyses identify 38 susceptibility loci for inflammatory  
798 bowel disease and highlight shared genetic risk across populations. *Nat. Genet.* **47**,  
799 979–986 (2015).
- 800 28. Sniekers, S. *et al.* Genome-wide association meta-analysis of 78,308 individuals  
801 identifies new loci and genes influencing human intelligence. *Nat. Genet.* **49**, 1107–  
802 1112 (2017).
- 803 29. Iglesias, A. I. *et al.* Cross-ancestry genome-wide association analysis of corneal  
804 thickness strengthens link between complex and Mendelian eye diseases. *Nat.*  
805 *Commun.* **9**, 1–11 (2018).
- 806 30. Morris, A. P. *et al.* Large-scale association analysis provides insights into the genetic  
807 architecture and pathophysiology of type 2 diabetes. *Nat. Genet.* **44**, 981–990 (2012).
- 808 31. Zacher, B. *et al.* Accurate promoter and enhancer identification in 127 ENCODE and  
809 roadmap epigenomics cell types and tissues by GenoSTAN. *PLoS One* **12**, 1–25  
810 (2017).
- 811 32. Maurano, M. T. *et al.* Systematic Localization of Common Disease-Associated



- 812 Variation in Regulatory DNA. *Science (80-. )*. **337**, 1190–1195 (2012).
- 813 33. Ernst, J. *et al.* Mapping and analysis of chromatin state dynamics in nine human cell  
814 types. *Nature* **473**, 43–49 (2011).
- 815 34. Iotchkova, V. *et al.* GARFIELD classifies disease-relevant genomic features through  
816 integration of functional annotations with association signals. *Nat. Genet.* **51**, (2019).
- 817 35. Farh, K. K. *et al.* Genetic and epigenetic fine mapping of causal autoimmune disease  
818 variants. *Nature* **518**, 337–343 (2015).
- 819 36. Zhou, J. & Troyanskaya, O. G. Predicting effects of noncoding variants with deep  
820 learning–based sequence model. *Nat. Methods* **12**, (2015).
- 821 37. Kelley, D. R., Snoek, J. & Rinn, J. L. Basset : learning the regulatory code of the  
822 accessible genome with deep convolutional neural networks. *Genome Res.* 990–999  
823 (2016). doi:10.1101/gr.200535.115
- 824 38. Benyamin, B. *et al.* Common variants in TMPRSS6 are associated with iron status  
825 and erythrocyte volume. *Nat. Genet.* **41**, 1173–1175 (2009).
- 826 39. Chambers, J. C. *et al.* Genome-wide association study identifies variants in  
827 TMPRSS6 associated with hemoglobin levels. *Nat. Genet.* **41**, 1170–1172 (2009).
- 828 40. Finberg, K. E. *et al.* Mutations in TMPRSS6 cause iron-refractory iron deficiency  
829 anemia (IRIDA). *Nat. Genet.* **40**, 569–571 (2008).
- 830 41. Muckenthaler, M. U., Rivella, S., Hentze, M. W. & Galy, B. A Red Carpet for Iron  
831 Metabolism. *Cell* **168**, 344–361 (2016).
- 832 42. Ulirsch, J. C. *et al.* Interrogation of human hematopoiesis at single-cell and single-  
833 variant resolution. *Nat. Genet.* **51**, (2019).
- 834 43. Asimit, J. L. *et al.* Stochastic search and joint fine-mapping increases accuracy and  
835 identifies previously unreported associations in immune-mediated diseases. *Nat.*  
836 *Commun.* **10**, (2019).
- 837 44. Fudenberg, G. *et al.* Formation of Chromosomal Domains by Loop Extrusion. *Cell*  
838 *Rep.* **15**, 2038–2049 (2016).
- 839 45. Hnisz, D., Shrinivas, K., Young, R. A., Chakraborty, A. K. & Sharp, P. A. A Phase  
840 Separation Model for Transcriptional Control. *Cell* **169**, 13–23 (2017).
- 841 46. Dekker, J., Rippe, K., Dekker, M. & Kleckner, N. Capturing Chromosome  
842 Conformation. *Science (80-. )*. **295**, 1306–1311 (2002).
- 843 47. Eijsbouts, C. Q., Burren, O. S., Newcombe, P. J. & Wallace, C. Fine mapping  
844 chromatin contacts in capture Hi-C data. *BMC Genomics* **20**, 1–13 (2019).
- 845 48. Cao, Q. *et al.* Reconstruction of enhancer – target networks in 935 samples of human  
846 primary cells , tissues and cell lines. *Nat. Genet.* **49**, 1428–1436 (2017).
- 847 49. Fishilevich, S. *et al.* Original article GeneHancer : genome-wide integration of  
848 enhancers and target genes in GeneCards. *Database* **2017**, 1–17 (2017).

- 849 50. Hait, T. A., Amar, D., Shamir, R. & Elkon, R. FOCS : a novel method for analyzing  
850 enhancer and gene activity patterns infers an extensive enhancer – promoter map.  
851 *Genome Biol.* **19**, 1–14 (2018).
- 852 51. Kumasaka, N., Knights, A. J. & Gaffney, D. J. High-resolution genetic mapping of  
853 putative causal interactions between regions of open chromatin. *Nat. Genet.* **51**,  
854 (2019).
- 855 52. Kan, Y. W. *et al.* Molecular basis of hemoglobin-H disease in the Mediterranean  
856 population. *Blood* **54**, 1434 LP – 1438 (1979).
- 857 53. Tolosano, E. & Chiabrando, D. Diamond Blackfan anemia at the crossroad between  
858 ribosome biogenesis and heme metabolism. *Adv. Hematol.* **2010**, (2010).
- 859 54. Kurita, R. *et al.* Establishment of Immortalized Human Erythroid Progenitor Cell Lines  
860 Able to Produce Enucleated Red Blood Cells. *PLoS One* **8**, (2013).
- 861 55. Moir-Meyer, G. *et al.* Robust CRISPR/Cas9 Genome Editing of the HUDEP-2  
862 Erythroid Precursor Line Using Plasmids and Single-Stranded Oligonucleotide  
863 Donors. *Methods Protoc.* **1**, 28 (2018).
- 864 56. Vinjamur, D. S. & Bauer, D. E. Growing and Genetically Manipulating Human  
865 Umbilical Cord Blood-Derived Erythroid Progenitor (HUDEP) Cell Lines. in  
866 *Erythropoiesis: Methods and Protocols* (ed. Lloyd, J. A.) 275–284 (Springer New  
867 York, 2018). doi:10.1007/978-1-4939-7428-3\_17
- 868 57. Bittorf, T., Jaster, R., Lüdtkke, B., Kamper, B. & Brock, J. Requirement for JAK2 in  
869 erythropoietin-induced signalling pathways. *Cell. Signal.* **9**, 85–89 (1997).
- 870 58. Oudelaar, A. M., Davies, J. O. J., Downes, D. J., Higgs, D. R. & Hughes, J. R. Robust  
871 detection of chromosomal interactions from small numbers of cells using low-input  
872 Capture-C. *Nucleic Acids Res.* **45**, (2017).
- 873 59. Geeven, G., Teunissen, H., Laat, W. De & Wit, E. De. peakC : a flexible , non-  
874 parametric peak calling package for 4C and Capture-C data. **46**, (2018).
- 875 60. Klein, F. A. *et al.* FourCSeq: Analysis of 4C sequencing data. *Bioinformatics* **31**,  
876 3085–3091 (2015).
- 877 61. Love, M. I., Huber, W. & Anders, S. Moderated estimation of fold change and  
878 dispersion for RNA-seq data with DESeq2. *Genome Biol.* **15**, 1–21 (2014).
- 879 62. Visscher, P. M. *et al.* 10 Years of GWAS Discovery: Biology, Function, and  
880 Translation. *Am. J. Hum. Genet.* **101**, 5–22 (2017).
- 881 63. Spain, S. L. & Barrett, J. C. Strategies for fine-mapping complex traits. *Human* **24**,  
882 111–119 (2015).
- 883 64. Liu, Y. *et al.* Identification of breast cancer associated variants that modulate  
884 transcription factor binding. *PLoS Genet.* 1–21 (2017).
- 885 65. Allen, E. K. *et al.* SNP-mediated disruption of CTCF binding at the IFITM3 promoter is

- 886 associated with risk of severe influenza in humans. *Nat. Med.* **23**, 975–983 (2017).
- 887 66. Gobbi, M. De *et al.* A Regulatory SNP Causes a Human Transcriptional Promoter.  
888 1215–1218 (2006).
- 889 67. Trakarnsanga, K. *et al.* An immortalized adult human erythroid line facilitates  
890 sustainable and scalable generation of functional red cells. *Nat. Commun.* **8**, 1–7  
891 (2017).
- 892 68. Ran, F. A. *et al.* Genome engineering using the CRISPR-Cas9 system. *Nat. Protoc.* **8**,  
893 2281–2308 (2013).
- 894 69. Nussbaum, L. *et al.* High-Throughput Genotyping of CRISPR/Cas Edited Cells in 96-  
895 Well Plates. *Methods Protoc.* **1**, 29 (2018).
- 896 70. Kosicki, M., Tomberg, K. & Bradley, A. Repair of CRISPR–Cas9-induced double-  
897 stranded breaks leads to large deletions and complex rearrangements. *Nat.*  
898 *Biotechnol.* **36**, 765–771 (2018).
- 899 71. Owens, D. D. G. *et al.* Microhomologies are prevalent at Cas9-induced larger  
900 deletions. *Nucleic Acids Res.* **47**, 7402–7417 (2019).
- 901 72. Dobin, A. *et al.* STAR: ultrafast universal RNA-seq aligner. *Bioinformatics* **29**, 15–21  
902 (2013).
- 903 73. Li, H. *et al.* The Sequence Alignment/Map format and SAMtools. *Bioinformatics* **25**,  
904 2078–2079 (2009).
- 905 74. Ramírez, F. *et al.* deepTools2: a next generation web server for deep-sequencing  
906 data analysis. *Nucleic Acids Res.* **44**, W160–W165 (2016).
- 907 75. Wickham, H. ggplot2: elegant graphics for data analysis. *J. Stat. Softw.* **77**, 3–5  
908 (2017).
- 909 76. Hughes, J. R. *et al.* Analysis of hundreds of cis-regulatory landscapes at high  
910 resolution in a single, high-throughput experiment. *Nat. Genet.* **46**, 205–12 (2014).
- 911 77. Hay, D. *et al.* Genetic dissection of the  $\alpha$ -globin super-enhancer in vivo. *Nat. Genet.*  
912 1–12 (2016). doi:10.1038/ng.3605
- 913 78. Hanssen, L. L. P. *et al.* Tissue-specific CTCF – cohesin-mediated chromatin  
914 architecture delimits enhancer interactions and function in vivo. *Nat. Cell Biol.* **19**,  
915 952–961 (2017).
- 916 79. Simon, C. S. *et al.* Functional characterisation of cis -regulatory elements governing  
917 dynamic Eomes expression in the early mouse embryo. *Development* **144**, 1249–  
918 1260 (2017).
- 919 80. Sankaran, V. G. *et al.* Human Fetal Hemoglobin Expression Is Regulated by the  
920 Developmental Stage-Specific Repressor BCL11A. *Science (80-. ).* **322**, 1839–1842  
921 (2008).
- 922 81. Roy, N. B. A. *et al.* A novel 33-Gene targeted resequencing panel provides accurate,

- 923 clinical-grade diagnosis and improves patient management for rare inherited  
924 anaemias. *Br. J. Haematol.* **175**, 318–330 (2016).
- 925 82. Camaschella, C. *et al.* The gene TFR2 is mutated in a new type of haemochromatosis  
926 mapping to 7q22. *Nat. Genet.* **25**, 14–15 (2000).
- 927 83. Ludwig, L. S. *et al.* Genome-wide association study follow-up identifies cyclin A2 as a  
928 regulator of the transition through cytokinesis during terminal erythropoiesis. *Am. J.*  
929 *Hematol.* **90**, 386–391 (2015).
- 930 84. Jayapal, S. R. *et al.* Cyclin A2 regulates erythrocyte morphology and numbers. *Cell*  
931 *Cycle* **15**, 3070–3081 (2016).
- 932 85. Bielczyk-Maczyńska, E. *et al.* A Loss of Function Screen of Identified Genome-Wide  
933 Association Study Loci Reveals New Genes Controlling Hematopoiesis. *PLoS Genet.*  
934 **10**, (2014).
- 935 86. Chen, F. *et al.* High-frequency genome editing using ssDNA oligonucleotides with  
936 zinc-finger nucleases. *Nat. Methods* **8**, 753–757 (2011).
- 937 87. Randle, S. J., Nelson, D. E., Patel, S. P. & Laman, H. Defective erythropoiesis in a  
938 mouse model of reduced Fbxo7 expression due to decreased p27 expression. *J.*  
939 *Pathol.* **237**, 263–272 (2015).
- 940 88. Cahalan, S. M. *et al.* Piezo1 links mechanical forces to red blood cell volume. *Elife* **4**,  
941 1–12 (2015).
- 942 89. Figueroa, A. A. *et al.* miR-181a regulates erythroid enucleation via the regulation of  
943 Xpo7 expression. *Haematologica* **103**, e341–e344 (2018).
- 944 90. Buenrostro, J. D., Giresi, P. G., Zaba, L. C., Chang, H. Y. & Greenleaf, W. J.  
945 Transposition of native chromatin for fast and sensitive epigenomic profiling of open  
946 chromatin, DNA-binding proteins and nucleosome position. *Nat. Methods* **10**, 1213–8  
947 (2013).
- 948 91. Telenius, J. M. & Hughes, J. R. NGseqBasic - a single-command UNIX tool for ATAC-  
949 seq, DNaseI-seq, Cut-and-Run, and ChIP-seq data mapping, high-resolution  
950 visualisation, and quality control. *bioRxiv* 393413 (2018). doi:10.1101/393413
- 951 92. Canver, M. C. *et al.* Variant-aware saturating mutagenesis using multiple Cas9  
952 nucleases identifies regulatory elements at trait-associated loci. *Nat. Genet.* **49**, 625–  
953 634 (2017).
- 954 93. ENCODE. An integrated encyclopedia of DNA elements in the human genome.  
955 *Nature* **489**, 57–74 (2012).
- 956 94. Huang, J. *et al.* Dynamic Control of Enhancer Repertoires Drives Lineage and Stage-  
957 Specific Transcription during Hematopoiesis. *Dev. Cell* **36**, 9–23 (2016).
- 958 95. Xu, J. *et al.* Developmental control of Polycomb subunit composition by GATA factors  
959 mediates a switch to non-canonical functions Jian. *Mol. Cell* **57**, 304–316 (2015).

- 960 96. Pinello, L., Xu, J., Orkin, S. H. & Yuan, G. Analysis of chromatin-state plasticity  
961 identifies cell-type – specific regulators of H3K27me3 patterns. *Proc. Natl. Acad. Sci.*  
962 344-E353 (2014). doi:10.1073/pnas.1322570111
- 963 97. Kang, Y. *et al.* Autophagy Driven by a Master Regulator of Hematopoiesis. *Mol. Cell.*  
964 *Biol.* 226–239 (2012). doi:10.1128/MCB.06166-11
- 965 98. Trompouki, E. *et al.* Lineage Regulators Direct BMP and Wnt Pathways to Cell-  
966 Specific Programs during Differentiation and Regeneration. *Cell* **147**, 577–589 (2011).
- 967 99. Mciver, S. C. *et al.* The exosome complex establishes a barricade to erythroid  
968 maturation. *Blood* **124**, 2285–2298 (2019).
- 969 100. Vries, P. S. De *et al.* Comparison of HapMap and 1000 Genomes Reference Panels  
970 in a Large-Scale Genome- Wide Association Study. *PLoS One* 1–22 (2017).  
971 doi:10.1371/journal.pone.0167742
- 972 101. Auton, A. *et al.* A global reference for human genetic variation. *Nature* **526**, 68–74  
973 (2015).
- 974 102. Ravenhall, M. *et al.* Novel genetic polymorphisms associated with severe malaria and  
975 under selective pressure in North-eastern Tanzania. *PLoS Genet.* **14**, e1007172  
976 (2018).
- 977 103. Fuchsberger, C. *et al.* The genetic architecture of type 2 diabetes. *Nature* **536**, 41–47  
978 (2016).
- 979 104. Machiela, M. J. & Chanock, S. J. LDlink: a web-based application for exploring  
980 population-specific haplotype structure and linking correlated alleles of possible  
981 functional variants. *Bioinformatics* **31**, 3555–3557 (2015).
- 982 105. Quinlan, A. R. & Hall, I. M. BEDTools: A flexible suite of utilities for comparing  
983 genomic features. *Bioinformatics* **26**, 841–842 (2010).
- 984 106. Feng, J., Liu, T., Qin, B., Zhang, Y. & Liu, X. S. Identifying ChIP-seq enrichment using  
985 MACS. *Nat. Protoc.* **7**, 1728–1740 (2012).
- 986 107. Stanton, K. P., Jin, J., Lederman, R. R., Weissman, S. M. & Kluger, Y. Ritornello: high  
987 fidelity control-free chromatin immunoprecipitation peak calling. *Nucleic Acids Res.*  
988 **45**, (2017).
- 989 108. McGowan, S. J., Hughes, J. R., Han, Z. P. & Taylor, S. MIG: Multi-Image Genome  
990 viewer. *Bioinformatics* **29**, 2477–2478 (2013).
- 991 109. Ernst, J. & Kellis, M. ChromHMM: Automating chromatin-state discovery and  
992 characterization. *Nat. Methods* **9**, 215–216 (2012).
- 993 110. Kolde, R. Pheatmap: pretty heatmaps. (2012).  
994

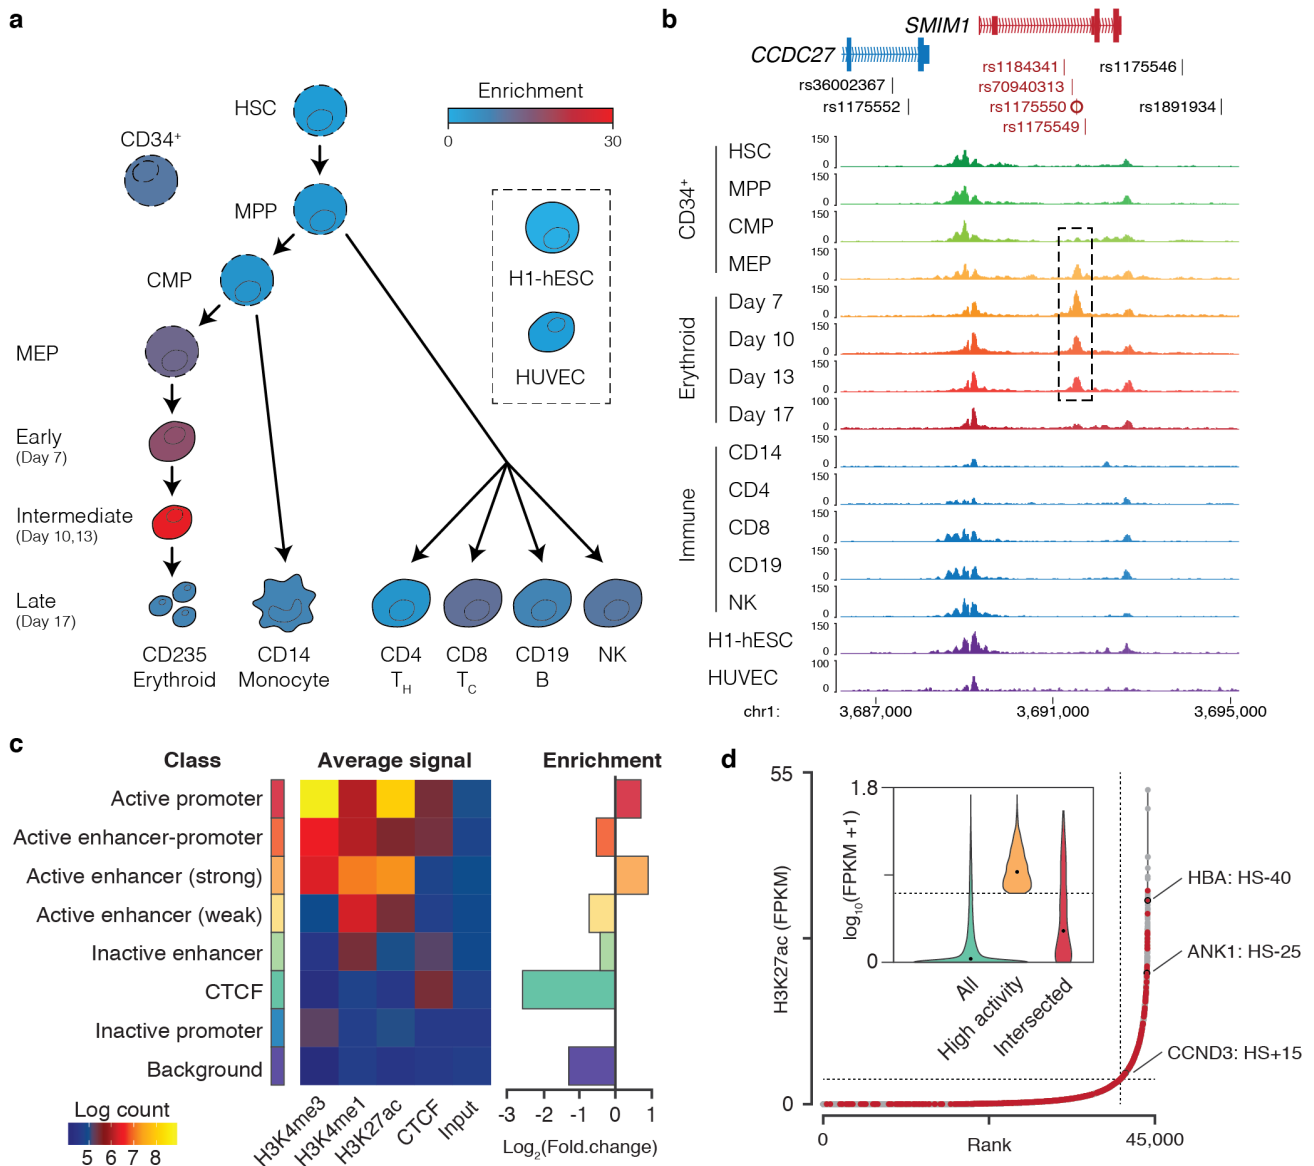

**Fig. 1 | Variants associated with RBC traits lie within highly active enhancers. a**, Schematic of selected cells from human haematopoiesis showing enrichment ( $-\log(p)$  of a cumulative Binomial Distribution) for RBC associated variants within open chromatin regions of haematopoietic stem cells (HSC), multi-potent progenitors (MPP), common myeloid progenitors (CMP), megakaryocyte-erythroid progenitors (MEP), early, intermediate, and late erythroid cells from *in vitro* culture, CD14 monocytes, CD4 helper and CD8 cytotoxic T-cells, CD19+ B-cells, natural killer cells (NK), human embryonic stem cells (H1-hESC) and human umbilical vein endothelial cells (HUVEC). **b**, ATAC-seq tracks showing location of open chromatin intersecting variants (red) at the SMIM1 locus. Intersected peaks are highlighted with a dashed box. The index SNP rs1175550 is marked (circle). **c**, GenoSTAN classification and average signal of open chromatin based upon epigenetic marks with the enrichment/depletion in representation of each class amongst elements containing variants. Note, no intersection with inactive promoters was detected so was excluded from enrichment analysis **d**, Open chromatin regions distal ( $\geq 2\text{kb}$ ) to annotated transcription start sites were ranked by level of H3K27ac ChIP-seq signal (FPKM), with highly active enhancers defined as those above the point of inflection of the curve (marked with a dashed line). Open chromatin regions containing RBC variants (dots coloured red) are enriched for highly active enhancer elements. Hypersensitive sites (HS) near important erythroid genes are shown. A violin plot of H3K27ac levels on all distal regions, highly active distal regions, and variant containing distal regions is inset; the median level is marked (black dot).

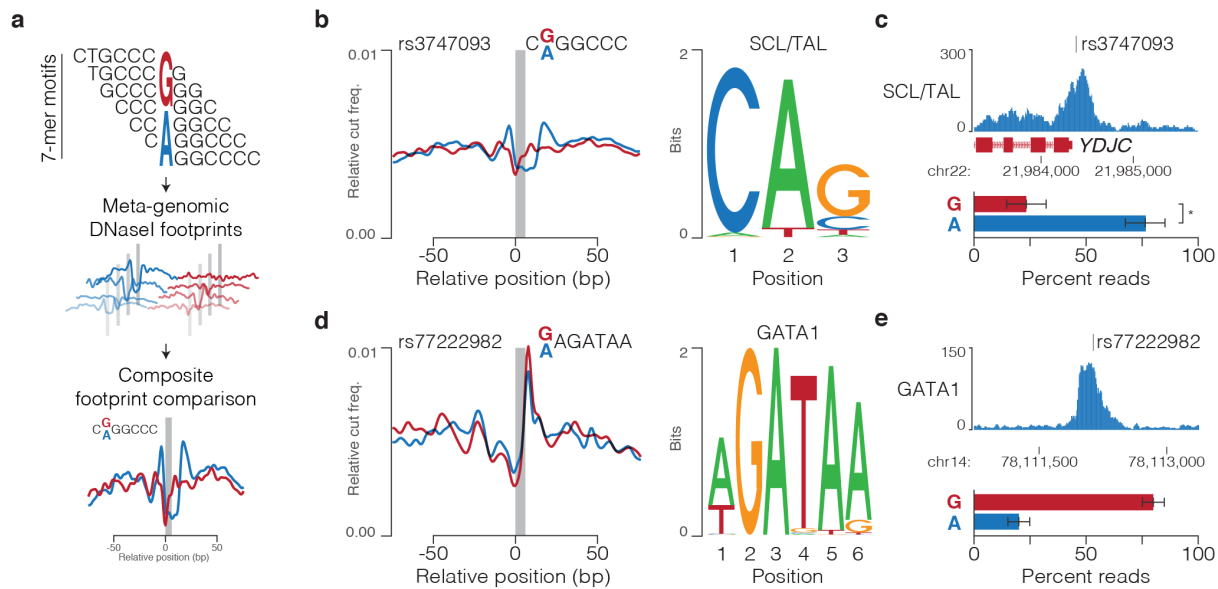

**Fig. 2 | Sasquatch provides an unbiased prediction of variant effect.** **a**, Sasquatch analyses *in vivo* generated DNaseI footprints over 7-mer motifs within open chromatin regions to generate meta-genomic footprints. Comparison of Relative cut frequency for each profile is used to generate predictive footprint-change scores. **b**, rs3747093 is within a 7-mer motif (grey bar) which is predicted to alter the DNaseI footprint of SCL/TAL based on presence of the SCL/TAL binding motif. **c**, SCL/TAL ChIP-seq shows allelic skew over rs3747093 as shown by percent of reads containing either allele (\*P=0.0468, Ratio paired t-test, n =3). **d**, rs77222982 is within a 7-mer motif (grey bar) which is predicted to alter the DNaseI footprint of GATA1 based on presence of the GATA1 binding motif. **e**, GATA1 ChIP-seq shows allelic skew over rs77222982 as shown by percent of reads containing either allele (n=2). Error bars depict standard error of the mean.

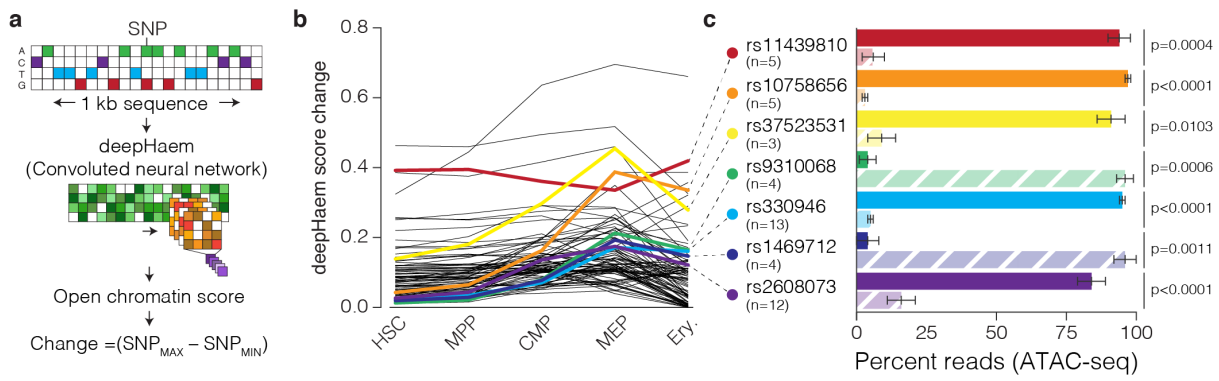

**Fig. 3 | Deep Learning predicts variant driven changes in chromatin accessibility.** **a**, deepHaem, a deep convoluted neural network, calculates a chromatin openness score using 1 kb of DNA sequence which can be used to compare variant alleles. **b**, Comparison of alleles for all RBC trait variants in open chromatin (n=2,662) identifies variants with a predicted to change deepHaem openness scores by more than 0.1, or 10% of the maximum openness score (n=91). **c**, Mean percentage of day 10 and day 13 erythroid ATAC-seq reads on either the reference (dark bar) or variant (light dashed bar) allele from heterozygous individuals with a minimum of 5 reads. Error bars depict the standard error of the mean with the number of independent replicates from either multiple donors and/or multiple differentiations shown in parentheses. p-values shown are for a ratio paired t-test.



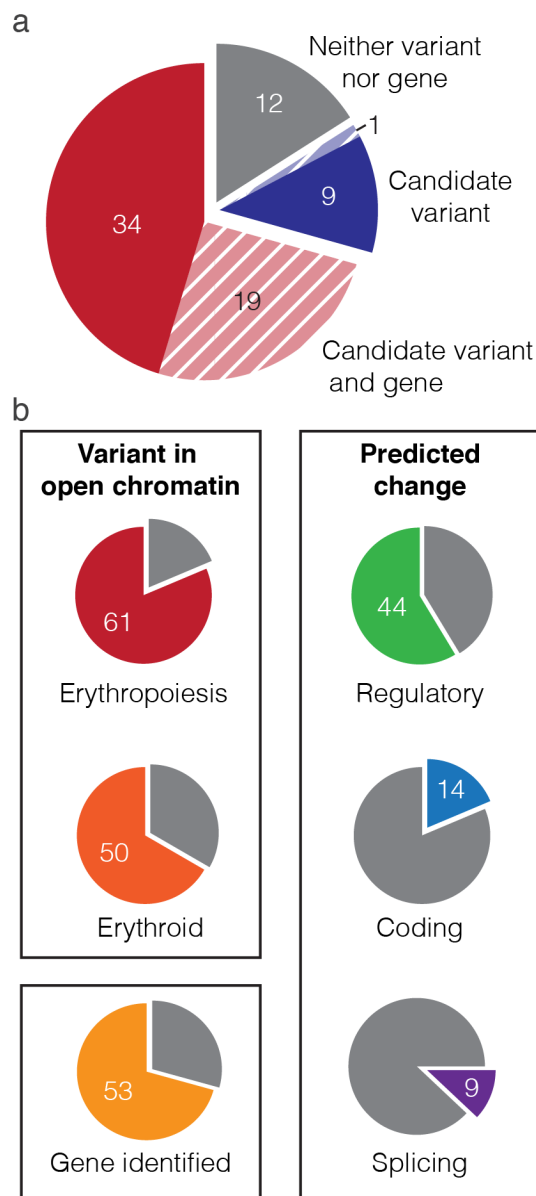

**Fig. 4 | The integrated experimental and bioinformatics platform identifies candidate causal variants and effector genes at the majority of polygenic trait regions. a**, Cumulative analysis of RBC trait associated variants at 75 GWAS chromosome regions identified candidate causal variants in 63 regions with three or fewer candidate causal variants at 43 regions (solid colouring) and more than three candidates at 20 regions (pale striped colouring). **b**, Pie charts with the number of regions, from a total of 75, with variants found in open chromatin, with variants predicted to alter a regulatory site (Sasquatch, deepHaem), or coding sequence (ANNOVAR), or splicing (SpiDEX, SpliceAI), and regions with identified candidate effector genes. Note, regions may have multiple candidate causal variants each with separate mechanisms of action.

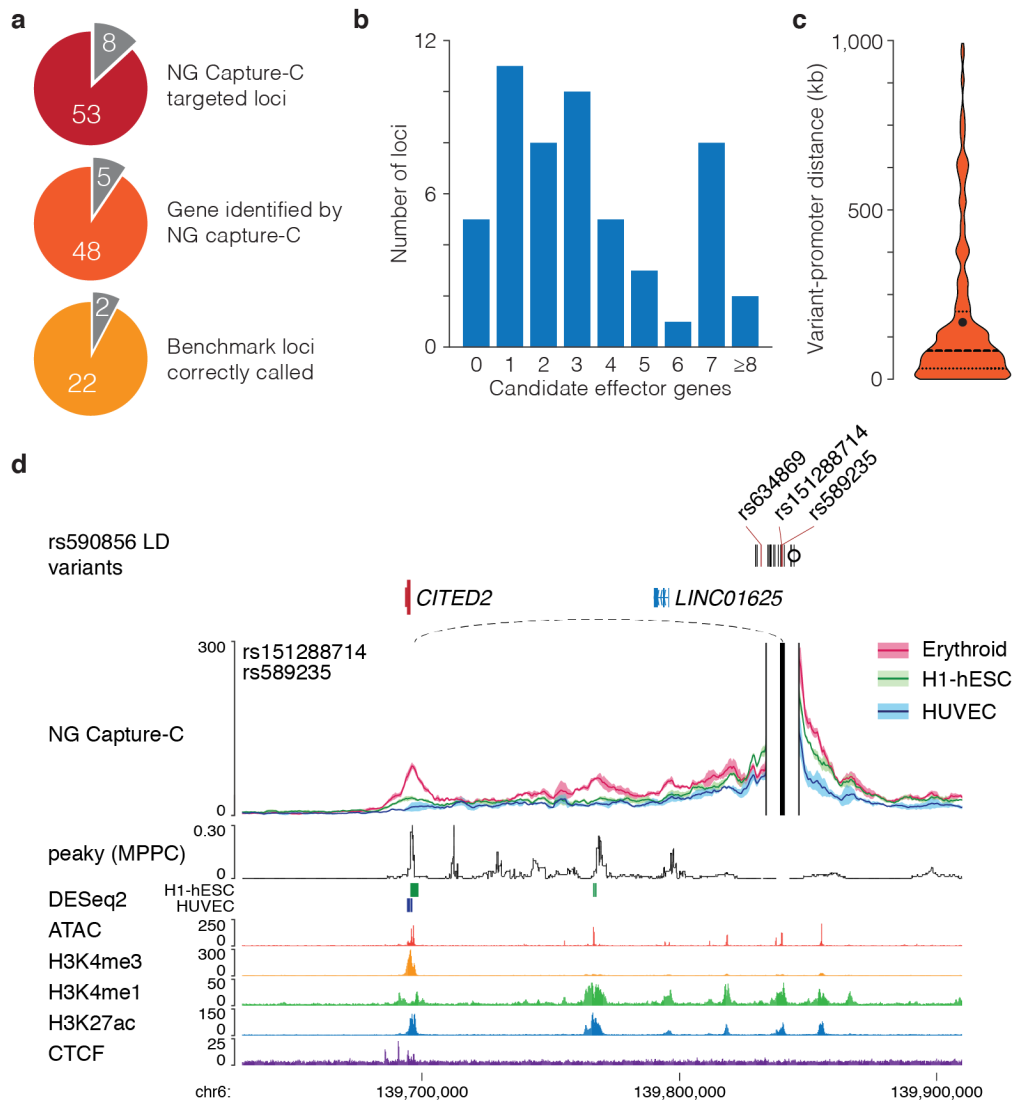

**Fig. 5 | NG Capture-C can detect long range variant-promoter interactions.** **a**, NG Capture-C oligonucleotides were designed for 61 chromosome regions with candidate regulatory causal variants, regions were excluded from targeting based on sheer number of targets (>100 target sites at a single locus, n=1), or where probes were impossible to design due to repetitive elements. Following analysis of generated 3C data genes were identified at 48 of the 53 targeted regions, 24 of which were used for accuracy benchmarking. **b**, Histogram of the number of candidate effector genes identified by NG Capture-C at each region. **c**, Violin plot of the distance between variants and the target transcription start sites. Median (83,944 bp) shown as a thick dashed line and mean (168,148 bp) shown as a black circle. **d**, 3C interaction profile for open chromatin containing rs151288714 and rs589235 in erythroid, human embryonic stem (H1-hESC) and human umbilical vein endothelial (HUVEC) cells (n=3). Capture viewpoints and proximity exclusion regions (solid vertical lines) were designed for open chromatin regions and profiles show mean interactions (solid line) with one standard deviation (shading). *CITED2*-variant interactions were identified as erythroid specific interactions (dashed loops; DESeq2 q-value < 0.05 shown as bars). Peaky values depict the Marginal Posterior Probability of Contact (MPPC) in erythroid cells. Variants within open chromatin are red, as are variant interacting genes, the index SNP is marked with a circle. FPKM normalised ATAC-seq and ChIP-seq tracks are from erythroid cells. Interaction was found with *CITED2*, which encodes the Cbp/p300 Interacting Transactivator with Glu/Asp (E/D)-rich tail 2 protein and required for normal haematopoiesis.

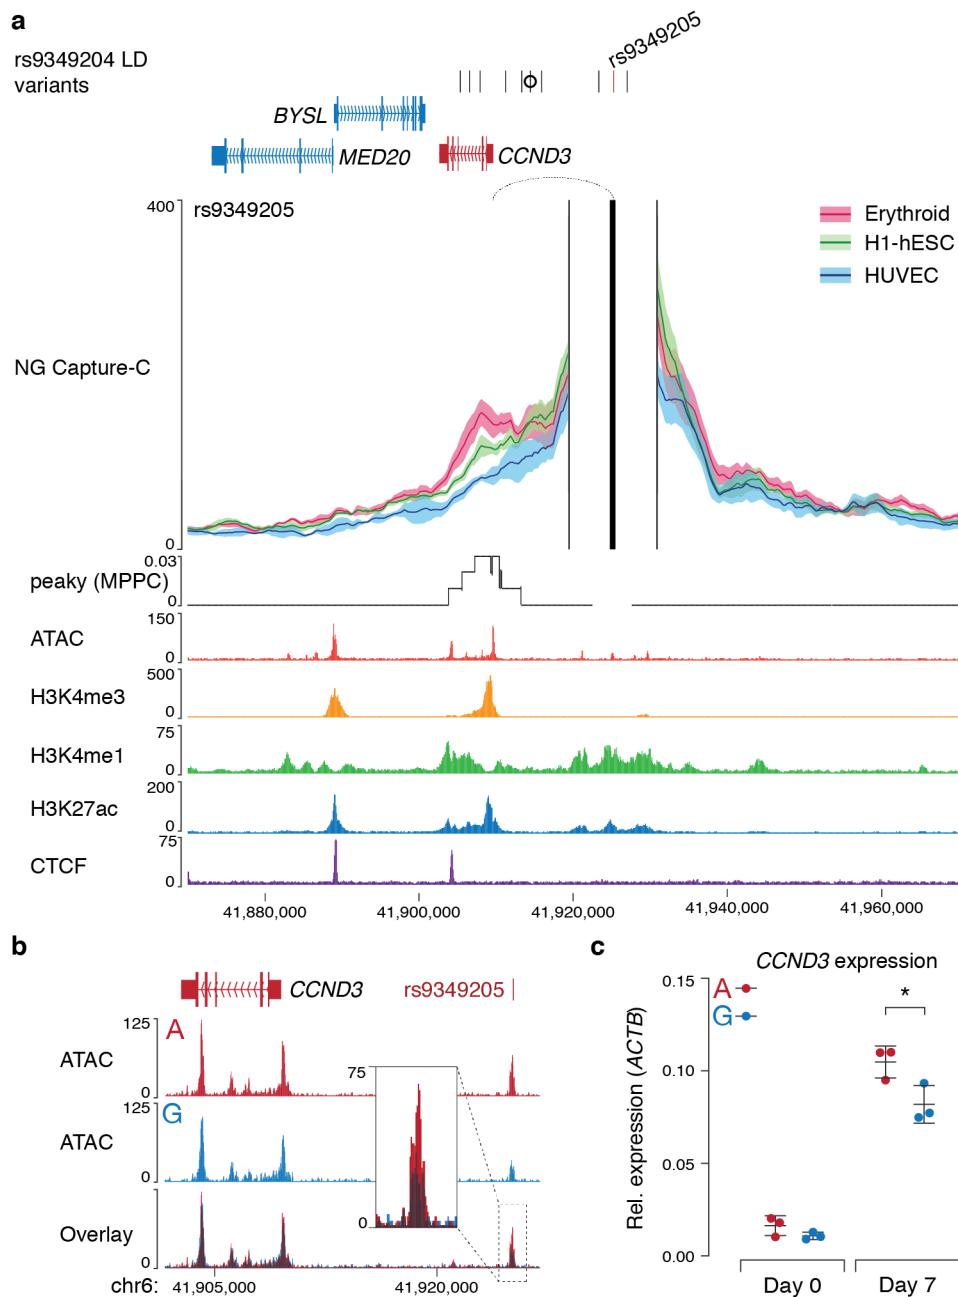

**Fig. 6 | rs9349205 interacts with, and regulates CCND3. a**, 3C interaction profile for rs9349205 in erythroid, embryonic stem (H1-hESC) and umbilical vein endothelial (HUVEC) cells (n=3). Profiles show windowed mean interactions (solid lines) with one standard deviation (shading). Peaky values depict the MPPC in erythroid cells. Interaction with *CCND3* was detected by peaky (dotted loop; MPPC > 0.01). Variants within open chromatin are red, as are variant interacting genes, the index SNP is marked with a circle. FPKM normalised ATAC-seq and ChIP-seq tracks are from erythroid cells. **b**, Merged FPKM normalised ATAC-seq (n=3) from HUDEP-2 cells homozygous for either rs9349205 allele with overlaid track showing high similarity, and a slight reduction at the intersected peak for homozygous G clones (inset). **c**, Real time reverse-transcriptase PCR of *CCND3* in differentiating HUDEP-2 clones (n=3) showed lower expression in G clones at day 7 (Student's two-tailed t-test, \*p=0.0387). Bars show mean and one standard deviation of independent clonal populations (circles).

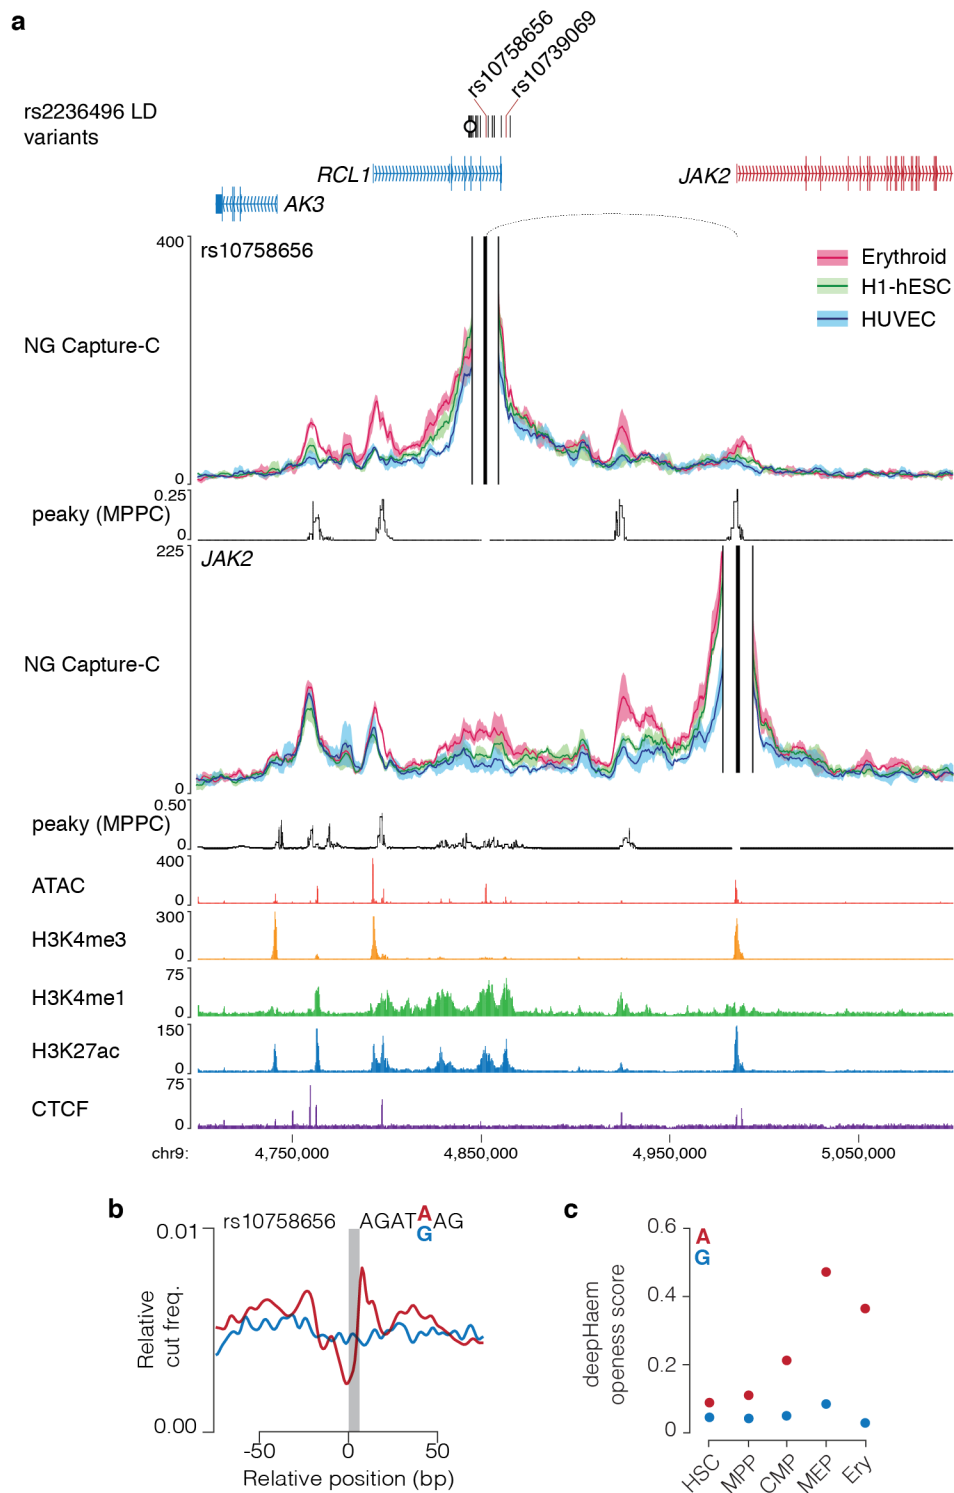

**Fig. 7 | rs10758656 interacts with JAK2 and is predicted to alter chromatin accessibility. a**, 3C interaction profiles for rs10758656 and JAK2 in erythroid, embryonic stem (H1-hESC) and umbilical vein endothelial (HUVEC) cells (n=3). Profiles show windowed mean interactions (solid lines) with one standard deviation (shading). Peaky values depict the MPPC in erythroid cells. JAK2-rs10758656 interaction was detected by peaky (dotted loop; MPPC > 0.01). Variants within open chromatin are red, as are variant interacting genes, the index SNP is marked with a circle. FPKM normalised ATAC-seq and ChIP-seq tracks are from erythroid cells. **b**, Sasquatch profiles for rs10758656 show loss of a GATA footprint. **c**, deepHaem openness scores rs10758656 predict a loss of chromatin accessibility in erythroid cells.

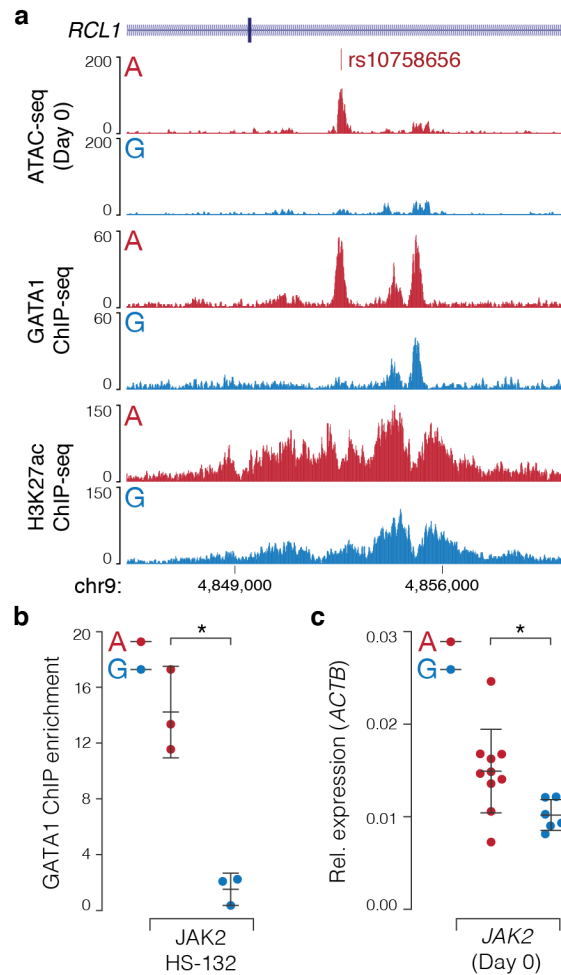

**Fig. 8 | rs10758656 causes loss of open chromatin and reduced *JAK2* expression.** **a**, Overlaid FPKM normalised ATAC-seq ( $n=3$ ) and H3K27ac ChIP-seq ( $n\geq 1$ ) from differentiating HUDEP-2 clones homozygous for either rs10758656 allele. Dark shading indicated overlapping signal **b**, Real time quantitative PCR for GATA1 ChIP at rs10758656 (\*Student's two-tailed t-test,  $p=0.0136$ ). **c**, Real time reverse-transcriptase PCR of *JAK2* in differentiating HUDEP-2 clones ( $n\geq 6$ ) showed lower expression in G clones (Mann-Witney test,  $*p=0.0160$ ). Bars show mean and one standard deviation of independent clonal populations (circles).
